# Supplementary material for: Protein expression profile changes of lung tissue in patients with pulmonary hypertension
Source: PeerJ. 2020 Jan 31;8:e8153. doi: 10.7717/peerj.8153 (PMC6996500; doi:10.7717/peerj.8153)
Supplement: Supplemental Information 1 — The upregulated or downregulated protein expression levels in both replicates with a relative quantification value of P < 0.05 and at least 1.2-fold changes were selected as being differentially expressed. [file peerj-08-8153-s001.xls]

## Sheet: Data Summary
Genename	FoldChange	Log2FoldChange	Differentially expressed	Uniprot	Biological Process	Cell Component	Molecular Function	KEGG Pathways	Disease	Drug
LDLRAP1	2.75419	1.46163	Upregulated	Q5SW96	GO:0008104,protein localization|GO:0080090,regulation of primary metabolic process|GO:0019222,regulation of metabolic process|GO:0051049,regulation of transport|GO:0048584,positive regulation of response to stimulus|GO:0048583,regulation of response to stimulus|GO:0061024,membrane organization|GO:0007009,plasma membrane organization|GO:0007165,signal transduction|GO:0048260,positive regulation of…	GO:0030424,axon|GO:0030117,membrane coat|GO:0030119,AP-type membrane coat adaptor complex|GO:0030118,clathrin coat|GO:0031982,vesicle|GO:0016023,cytoplasmic membrane-bounded vesicle|GO:0016020,membrane|GO:0031988,membrane-bounded vesicle|GO:0005794,Golgi apparatus|GO:0098588,bounding membrane of organelle|GO:0098589,membrane region|GO:0005798,Golgi-associated vesicle|GO:0042995,cell projection|GO…	GO:0030276,clathrin binding|GO:0030159,receptor signaling complex scaffold activity|GO:0044877,macromolecular complex binding|GO:0032947,protein complex scaffold|GO:0045309,protein phosphorylated amino acid binding|GO:0043167,ion binding|GO:0043168,anion binding|GO:0001540,beta-amyloid binding|GO:0005543,phospholipid binding|GO:0005546,phosphatidylinositol-4,5-bisphosphate binding|GO:0005198,stru…	hsa04144,Endocytosis
FTL	2.5515	1.35134	Upregulated	P02792	GO:0050801,ion homeostasis|GO:0051649,establishment of localization in cell|GO:0042592,homeostatic process|GO:0098771,inorganic ion homeostasis|GO:0055072,iron ion homeostasis|GO:0006826,iron ion transport|GO:0055076,transition metal ion homeostasis|GO:0030001,metal ion transport|GO:0044699,single-organism process|GO:0046916,cellular transition metal ion homeostasis|GO:0000041,transition metal io…	GO:0008043,intracellular ferritin complex|GO:0043227,membrane-bounded organelle|GO:0043226,organelle|GO:0005737,cytoplasm|GO:0070288,ferritin complex|GO:0031982,vesicle|GO:0016020,membrane|GO:0031988,membrane-bounded vesicle|GO:0032991,macromolecular complex|GO:1903561,extracellular vesicle|GO:0070062,extracellular exosome|GO:0043234,protein complex|GO:0043230,extracellular organelle|GO:0005829,c…	GO:0043169,cation binding|GO:0046914,transition metal ion binding|GO:0043167,ion binding|GO:0008199,ferric iron binding|GO:0005488,binding|GO:0005515,protein binding|GO:0005506,iron ion binding|GO:0046872,metal ion binding|GO:0042802,identical protein binding	hsa04978,Mineral absorption	H00043,Neuroblastoma
CHUK	2.50992	1.32764	Upregulated	O15111	GO:0009628,response to abiotic stimulus|GO:0080090,regulation of primary metabolic process|GO:0019222,regulation of metabolic process|GO:0007595,lactation|GO:0009636,response to toxic substance|GO:0048584,positive regulation of response to stimulus|GO:0048583,regulation of response to stimulus|GO:0031349,positive regulation of defense response|GO:0003012,muscle system process|GO:0007165,signal tr…	GO:0035631,CD40 receptor complex|GO:1990234,transferase complex|GO:0031974,membrane-enclosed lumen|GO:0043229,intracellular organelle|GO:0071944,cell periphery|GO:0098552,side of membrane|GO:0031226,intrinsic component of plasma membrane|GO:0043226,organelle|GO:0031224,intrinsic component of membrane|GO:0005737,cytoplasm|GO:0098797,plasma membrane protein complex|GO:0031981,nuclear lumen|GO:00700…	GO:0035639,purine ribonucleoside triphosphate binding|GO:0004672,protein kinase activity|GO:0043167,ion binding|GO:1901363,heterocyclic compound binding|GO:0001883,purine nucleoside binding|GO:0001882,nucleoside binding|GO:0043168,anion binding|GO:0000166,nucleotide binding|GO:0004674,protein serine/threonine kinase activity|GO:0016740,transferase activity|GO:1901265,nucleoside phosphate binding|…	hsa05131,Shigellosis|hsa05212,Pancreatic cancer|hsa05220,Chronic myeloid leukemia|hsa05215,Prostate cancer|hsa05200,Pathways in cancer|hsa04068,FoxO signaling pathway|hsa04380,Osteoclast differentiation|hsa04064,NF-kappa B signaling pathway|hsa04062,Chemokine signaling pathway|hsa04920,Adipocytokine signaling pathway|hsa05142,Chagas disease (American trypanosomiasis)|hsa05168,Herpes simplex infec…
FTH1	2.18567	1.12808	Upregulated	G3V1D1	GO:0050801,ion homeostasis|GO:0042592,homeostatic process|GO:0055072,iron ion homeostasis|GO:0006826,iron ion transport|GO:0055076,transition metal ion homeostasis|GO:0098771,inorganic ion homeostasis|GO:0044699,single-organism process|GO:0046916,cellular transition metal ion homeostasis|GO:0000041,transition metal ion transport|GO:0065007,biological regulation|GO:0065008,regulation of biological…	GO:0005623,cell	GO:0043169,cation binding|GO:0046914,transition metal ion binding|GO:0043167,ion binding|GO:0008199,ferric iron binding|GO:0005488,binding|GO:0005506,iron ion binding|GO:0046872,metal ion binding
TOMM22	2.10801	1.07588	Upregulated	Q9NS69	GO:0008104,protein localization|GO:0051649,establishment of localization in cell|GO:0061024,membrane organization|GO:0007008,outer mitochondrial membrane organization|GO:0051641,cellular localization|GO:0007005,mitochondrion organization|GO:0007006,mitochondrial membrane organization|GO:0044699,single-organism process|GO:0044267,cellular protein metabolic process|GO:0071806,protein transmembrane …	GO:0098799,outer mitochondrial membrane protein complex|GO:0031975,envelope|GO:0043229,intracellular organelle|GO:0043227,membrane-bounded organelle|GO:0043226,organelle|GO:0031224,intrinsic component of membrane|GO:0005737,cytoplasm|GO:0005742,mitochondrial outer membrane translocase complex|GO:0031090,organelle membrane|GO:0005743,mitochondrial inner membrane|GO:0016021,integral component of me…	GO:0008565,protein transporter activity|GO:0022891,substrate-specific transmembrane transporter activity|GO:0022892,substrate-specific transporter activity|GO:0022884,macromolecule transmembrane transporter activity|GO:0005215,transporter activity|GO:0008320,protein transmembrane transporter activity|GO:0022857,transmembrane transporter activity|GO:0005488,binding|GO:0005515,protein binding
ADPRH	1.948	0.961991	Upregulated	C9JZW7
MFAP4	1.82491	0.867827	Upregulated	K7ES70
SLC6A4	1.81439	0.859486	Upregulated	P31645	GO:0021924,cell proliferation in external granule layer|GO:0009628,response to abiotic stimulus|GO:0019222,regulation of metabolic process|GO:0009636,response to toxic substance|GO:0048468,cell development|GO:0007613,memory|GO:0007610,behavior|GO:0007611,learning or memory|GO:0060322,head development|GO:0001504,neurotransmitter uptake|GO:0001505,regulation of neurotransmitter levels|GO:0035265,or…	GO:0043229,intracellular organelle|GO:0071944,cell periphery|GO:0043227,membrane-bounded organelle|GO:0043226,organelle|GO:0031224,intrinsic component of membrane|GO:0010008,endosome membrane|GO:0005737,cytoplasm|GO:0031090,organelle membrane|GO:0031226,intrinsic component of plasma membrane|GO:0016021,integral component of membrane|GO:0016020,membrane|GO:0097458,neuron part|GO:0043005,neuron pro…	GO:0005328,neurotransmitter:sodium symporter activity|GO:0005326,neurotransmitter transporter activity|GO:0017022,myosin binding|GO:0008144,drug binding|GO:0031267,small GTPase binding|GO:0051020,GTPase binding|GO:0044877,macromolecular complex binding|GO:0005488,binding|GO:1901363,heterocyclic compound binding|GO:0019811,cocaine binding|GO:0070405,ammonium ion binding|GO:0015081,sodium ion trans…	hsa04726,Serotonergic synapse		D00110,Cocaine (USP); Cocaine (TN)|D00228,Amoxapine (JP16/USP/INN); Asendin (TN)|D00326,Fluoxetine (USAN/INN); Fluoxetine (TN)|D00367,Mazindol (JAN/USP/INN); Sanorex (TN)|D00394,Trimipramine (USAN/INN)|D00809,Amitriptyline hydrochloride (JP16/USP); Elavil (TN)|D00811,Clomipramine hydrochloride (JP16/USP); Anafranil (TN)|D00812,Desipramine hydrochloride (JAN/USP); Norpramin (TN)|D00815,Imipramine …
PIP4K2A	1.8095	0.855592	Upregulated	P48426	GO:0006650,glycerophospholipid metabolic process|GO:0016310,phosphorylation|GO:0030154,cell differentiation|GO:0048468,cell development|GO:0060348,bone development|GO:0001501,skeletal system development|GO:0098751,bone cell development|GO:0061515,myeloid cell development|GO:0044281,small molecule metabolic process|GO:0044255,cellular lipid metabolic process|GO:0044699,single-organism process|GO:0…	GO:0005737,cytoplasm|GO:0005829,cytosol|GO:0043231,intracellular membrane-bounded organelle|GO:0005634,nucleus|GO:0016020,membrane|GO:0044464,cell part|GO:0044444,cytoplasmic part|GO:0005623,cell|GO:0005622,intracellular|GO:0043229,intracellular organelle|GO:0071944,cell periphery|GO:0005886,plasma membrane|GO:0044424,intracellular part|GO:0043227,membrane-bounded organelle|GO:0043226,organelle	GO:0035639,purine ribonucleoside triphosphate binding|GO:0005488,binding|GO:0043167,ion binding|GO:1901363,heterocyclic compound binding|GO:0001883,purine nucleoside binding|GO:0001882,nucleoside binding|GO:0043168,anion binding|GO:0000166,nucleotide binding|GO:0016740,transferase activity|GO:1901265,nucleoside phosphate binding|GO:0032549,ribonucleoside binding|GO:0017076,purine nucleotide bindi…	hsa00562,Inositol phosphate metabolism|hsa04810,Regulation of actin cytoskeleton|hsa04070,Phosphatidylinositol signaling system
PRKAA1	1.79374	0.842971	Upregulated	Q13131	GO:0046434,organophosphate catabolic process|GO:0051049,regulation of transport|GO:0009166,nucleotide catabolic process|GO:0009167,purine ribonucleoside monophosphate metabolic process|GO:0044281,small molecule metabolic process|GO:0044283,small molecule biosynthetic process|GO:0051716,cellular response to stimulus|GO:0001666,response to hypoxia|GO:0030258,lipid modification|GO:0000165,MAPK casca…	GO:0098590,plasma membrane region|GO:0031974,membrane-enclosed lumen|GO:0043229,intracellular organelle|GO:0071944,cell periphery|GO:0043227,membrane-bounded organelle|GO:0043226,organelle|GO:0005737,cytoplasm|GO:0045177,apical part of cell|GO:0031981,nuclear lumen|GO:1902911,protein kinase complex|GO:0005634,nucleus|GO:0016020,membrane|GO:0005654,nucleoplasm|GO:0044459,plasma membrane part|GO:00…	GO:0047322,[hydroxymethylglutaryl-CoA reductase (NADPH)] kinase activity|GO:0008022,protein C-terminus binding|GO:0035639,purine ribonucleoside triphosphate binding|GO:0019899,enzyme binding|GO:0044877,macromolecular complex binding|GO:0005488,binding|GO:0004691,cAMP-dependent protein kinase activity|GO:0004690,cyclic nucleotide-dependent protein kinase activity|GO:1901363,heterocyclic compound b…	hsa05410,Hypertrophic cardiomyopathy (HCM)|hsa04932,Non-alcoholic fatty liver disease (NAFLD)|hsa04910,Insulin signaling pathway|hsa04931,Insulin resistance|hsa04140,Regulation of autophagy|hsa04710,Circadian rhythm|hsa04921,Oxytocin signaling pathway|hsa04068,FoxO signaling pathway|hsa04211,Longevity regulating pathway|hsa04213,Longevity regulating pathway - multiple species|hsa04920,Adipocytoki…		D00595,Buformin (USAN/INN)|D00944,Metformin hydrochloride (JP16/USP); Glucophage (TN)|D02206,Buformin hydrochloride (JP16); Dibetos-B (TN)|D03647,Dapiclermin (USAN/INN); Axokine (TN)|D04966,Metformin (USAN/INN)|D08351,Phenformin (BAN)|D08352,Phenformin hydrochloride; Debei (TN)
FAM114A2	1.79049	0.840354	Upregulated	E7ESJ7
FRYL	1.73838	0.797742	Upregulated	O94915	GO:0032502,developmental process|GO:0048856,anatomical structure development|GO:0080090,regulation of primary metabolic process|GO:0019222,regulation of metabolic process|GO:0030030,cell projection organization|GO:0031326,regulation of cellular biosynthetic process|GO:0030154,cell differentiation|GO:0031323,regulation of cellular metabolic process|GO:0030036,actin cytoskeleton organization|GO:009…	GO:0005737,cytoplasm|GO:0044464,cell part|GO:0030427,site of polarized growth|GO:0005623,cell|GO:0005622,intracellular|GO:0044444,cytoplasmic part|GO:0071944,cell periphery|GO:0005938,cell cortex|GO:0044424,intracellular part
H3F3B	1.67959	0.748111	Upregulated	K7EK07		GO:0044815,DNA packaging complex|GO:0043229,intracellular organelle|GO:0043228,non-membrane-bounded organelle|GO:0000785,chromatin|GO:0000786,nucleosome|GO:0043227,membrane-bounded organelle|GO:0043226,organelle|GO:0005634,nucleus|GO:0005694,chromosome|GO:0043234,protein complex|GO:0032991,macromolecular complex|GO:0043231,intracellular membrane-bounded organelle|GO:0043232,intracellular non-memb…	GO:0003676,nucleic acid binding|GO:0097159,organic cyclic compound binding|GO:0005488,binding|GO:0005515,protein binding|GO:0003677,DNA binding|GO:0046983,protein dimerization activity|GO:0046982,protein heterodimerization activity|GO:1901363,heterocyclic compound binding
DOCK5	1.65045	0.722859	Upregulated	Q9H7D0	GO:0009893,positive regulation of metabolic process|GO:0019222,regulation of metabolic process|GO:0023052,signaling|GO:0007165,signal transduction|GO:0035556,intracellular signal transduction|GO:0043087,regulation of GTPase activity|GO:0050789,regulation of biological process|GO:0044699,single-organism process|GO:0051716,cellular response to stimulus|GO:0043547,positive regulation of GTPase activ…	GO:0005737,cytoplasm|GO:0044464,cell part|GO:0005623,cell|GO:0005622,intracellular|GO:0044424,intracellular part	GO:0098772,molecular function regulator|GO:0005085,guanyl-nucleotide exchange factor activity
HLA-A	1.61563	0.692098	Upregulated	P30453	GO:0019221,cytokine-mediated signaling pathway|GO:0048583,regulation of response to stimulus|GO:0042590,antigen processing and presentation of exogenous peptide antigen via MHC class I|GO:0023052,signaling|GO:0007165,signal transduction|GO:0007166,cell surface receptor signaling pathway|GO:0042221,response to chemical|GO:0048002,antigen processing and presentation of peptide antigen|GO:0070887,ce…	GO:0005783,endoplasmic reticulum|GO:0098576,lumenal side of membrane|GO:0005886,plasma membrane|GO:0005789,endoplasmic reticulum membrane|GO:0030139,endocytic vesicle|GO:0042175,nuclear outer membrane-endoplasmic reticulum membrane network|GO:0043229,intracellular organelle|GO:0030176,integral component of endoplasmic reticulum membrane|GO:0031301,integral component of organelle membrane|GO:00313…	GO:0042277,peptide binding|GO:0003823,antigen binding|GO:0042605,peptide antigen binding|GO:0033218,amide binding|GO:0005488,binding|GO:0005515,protein binding|GO:0030881,beta-2-microglobulin binding
HIST2H3A	1.53886	0.621867	Upregulated	Q71DI3	GO:0007599,hemostasis|GO:0080090,regulation of primary metabolic process|GO:0019222,regulation of metabolic process|GO:0007596,blood coagulation|GO:0007165,signal transduction|GO:1901362,organic cyclic compound biosynthetic process|GO:0071840,cellular component organization or biogenesis|GO:0006306,DNA methylation|GO:0051716,cellular response to stimulus|GO:0006304,DNA modification|GO:0010605,neg…	GO:0031974,membrane-enclosed lumen|GO:0044815,DNA packaging complex|GO:0043229,intracellular organelle|GO:0043228,non-membrane-bounded organelle|GO:0000785,chromatin|GO:0000786,nucleosome|GO:0043227,membrane-bounded organelle|GO:0043226,organelle|GO:0070062,extracellular exosome|GO:0031981,nuclear lumen|GO:0005634,nucleus|GO:0031988,membrane-bounded vesicle|GO:0005654,nucleoplasm|GO:0005694,chrom…	GO:0042393,histone binding|GO:0005515,protein binding|GO:0097159,organic cyclic compound binding|GO:0005488,binding|GO:0003676,nucleic acid binding|GO:0003677,DNA binding|GO:0046983,protein dimerization activity|GO:0046982,protein heterodimerization activity|GO:1901363,heterocyclic compound binding	hsa05322,Systemic lupus erythematosus|hsa05034,Alcoholism|hsa05202,Transcriptional misregulation in cancer
STK4	1.50288	0.587734	Upregulated	Q13043	GO:2001235,positive regulation of apoptotic signaling pathway|GO:2001236,regulation of extrinsic apoptotic signaling pathway|GO:0001569,patterning of blood vessels|GO:0019220,regulation of phosphate metabolic process|GO:0080090,regulation of primary metabolic process|GO:0019222,regulation of metabolic process|GO:2001233,regulation of apoptotic signaling pathway|GO:0048585,negative regulation of r…	GO:0005737,cytoplasm|GO:0044446,intracellular organelle part|GO:0005829,cytosol|GO:0043231,intracellular membrane-bounded organelle|GO:0031981,nuclear lumen|GO:0043233,organelle lumen|GO:0005634,nucleus|GO:0044464,cell part|GO:0044444,cytoplasmic part|GO:0031974,membrane-enclosed lumen|GO:0005622,intracellular|GO:0005654,nucleoplasm|GO:0070013,intracellular organelle lumen|GO:0043229,intracellula…	GO:0019207,kinase regulator activity|GO:0035639,purine ribonucleoside triphosphate binding|GO:0019209,kinase activator activity|GO:0060089,molecular transducer activity|GO:0008047,enzyme activator activity|GO:0004871,signal transducer activity|GO:0098772,molecular function regulator|GO:1901363,heterocyclic compound binding|GO:0001883,purine nucleoside binding|GO:0001882,nucleoside binding|GO:0043…	hsa04014,Ras signaling pathway|hsa05223,Non-small cell lung cancer|hsa05200,Pathways in cancer|hsa04068,FoxO signaling pathway|hsa04010,MAPK signaling pathway
POLR2I	1.50014	0.585093	Upregulated	K7EKS1	GO:0006352,DNA-templated transcription, initiation|GO:0032774,RNA biosynthetic process|GO:0006139,nucleobase-containing compound metabolic process|GO:0090304,nucleic acid metabolic process|GO:0044249,cellular biosynthetic process|GO:0034641,cellular nitrogen compound metabolic process|GO:0006807,nitrogen compound metabolic process|GO:0034645,cellular macromolecule biosynthetic process|GO:1901576,…	GO:0044446,intracellular organelle part|GO:0043231,intracellular membrane-bounded organelle|GO:0031981,nuclear lumen|GO:0043233,organelle lumen|GO:0005634,nucleus|GO:0044464,cell part|GO:0031974,membrane-enclosed lumen|GO:0005622,intracellular|GO:0005654,nucleoplasm|GO:0070013,intracellular organelle lumen|GO:0043229,intracellular organelle|GO:0044428,nuclear part|GO:0005623,cell|GO:0044424,intra…	GO:0016779,nucleotidyltransferase activity|GO:0016772,transferase activity, transferring phosphorus-containing groups|GO:0034062,RNA polymerase activity|GO:0003824,catalytic activity|GO:0016740,transferase activity|GO:0005488,binding|GO:0003676,nucleic acid binding|GO:0003677,DNA binding|GO:0003899,DNA-directed RNA polymerase activity|GO:0097159,organic cyclic compound binding|GO:1901363,heterocy…
NPTN	1.47558	0.561286	Upregulated	Q9UFM8	GO:0016310,phosphorylation|GO:0018108,peptidyl-tyrosine phosphorylation|GO:0023052,signaling|GO:0007165,signal transduction|GO:0007166,cell surface receptor signaling pathway|GO:0007167,enzyme linked receptor protein signaling pathway|GO:0007169,transmembrane receptor protein tyrosine kinase signaling pathway|GO:0050789,regulation of biological process|GO:0044699,single-organism process|GO:004426…		GO:0038023,signaling receptor activity|GO:0003824,catalytic activity|GO:0016773,phosphotransferase activity, alcohol group as acceptor|GO:0016772,transferase activity, transferring phosphorus-containing groups|GO:0016301,kinase activity|GO:0004888,transmembrane signaling receptor activity|GO:0060089,molecular transducer activity|GO:0004714,transmembrane receptor protein tyrosine kinase activity|G…
HLA-DPA1	1.44548	0.531552	Upregulated	J3KQ99	GO:0002504,antigen processing and presentation of peptide or polysaccharide antigen via MHC class II|GO:0019882,antigen processing and presentation|GO:0050896,response to stimulus|GO:0002376,immune system process|GO:0006955,immune response	GO:0042611,MHC protein complex|GO:0043234,protein complex|GO:0042613,MHC class II protein complex|GO:0032991,macromolecular complex|GO:0016021,integral component of membrane|GO:0016020,membrane|GO:0044464,cell part|GO:0005623,cell|GO:0098797,plasma membrane protein complex|GO:0098796,membrane protein complex|GO:0071944,cell periphery|GO:0005886,plasma membrane|GO:0044425,membrane part|GO:0044459,…
ABLIM1	1.43241	0.518448	Upregulated	F8W8M4	GO:0006996,organelle organization|GO:0007010,cytoskeleton organization|GO:0009987,cellular process|GO:0016043,cellular component organization|GO:0071840,cellular component organization or biogenesis		GO:0043169,cation binding|GO:0046914,transition metal ion binding|GO:0008092,cytoskeletal protein binding|GO:0043167,ion binding|GO:0003779,actin binding|GO:0008270,zinc ion binding|GO:0005515,protein binding|GO:0046872,metal ion binding|GO:0005488,binding
RNPS1	1.43119	0.517214	Upregulated	H3BV80			GO:0097159,organic cyclic compound binding|GO:0000166,nucleotide binding|GO:0036094,small molecule binding|GO:0005488,binding|GO:0003676,nucleic acid binding|GO:1901363,heterocyclic compound binding|GO:1901265,nucleoside phosphate binding
KIAA0368	1.42795	0.513951	Upregulated	J3KN16
GIMAP7	1.41335	0.499117	Upregulated	Q8NHV1		GO:0005737,cytoplasm|GO:0043232,intracellular non-membrane-bounded organelle|GO:0005811,lipid particle|GO:0044464,cell part|GO:0005623,cell|GO:0005622,intracellular|GO:0043229,intracellular organelle|GO:0043228,non-membrane-bounded organelle|GO:0044424,intracellular part|GO:0043226,organelle	GO:0035639,purine ribonucleoside triphosphate binding|GO:0005488,binding|GO:0043167,ion binding|GO:1901363,heterocyclic compound binding|GO:1901265,nucleoside phosphate binding|GO:0001882,nucleoside binding|GO:0043168,anion binding|GO:0016462,pyrophosphatase activity|GO:0000166,nucleotide binding|GO:0032561,guanyl ribonucleotide binding|GO:0001883,purine nucleoside binding|GO:0032549,ribonucleosi…
EXOC3	1.4084	0.494057	Upregulated	O60645	GO:0008104,protein localization|GO:0061024,membrane organization|GO:0032940,secretion by cell|GO:0034629,cellular protein complex localization|GO:0071840,cellular component organization or biogenesis|GO:0044267,cellular protein metabolic process|GO:0044260,cellular macromolecule metabolic process|GO:0070727,cellular macromolecule localization|GO:0006887,exocytosis|GO:0016043,cellular component or…	GO:0043229,intracellular organelle|GO:0071944,cell periphery|GO:0043227,membrane-bounded organelle|GO:0043226,organelle|GO:0005737,cytoplasm|GO:0030667,secretory granule membrane|GO:0031982,vesicle|GO:0000145,exocyst|GO:0016023,cytoplasmic membrane-bounded vesicle|GO:0031410,cytoplasmic vesicle|GO:0098805,whole membrane|GO:0016020,membrane|GO:0031988,membrane-bounded vesicle|GO:0044433,cytoplasmi…	GO:0000149,SNARE binding|GO:0005488,binding|GO:0005515,protein binding	hsa04530,Tight junction
CYP27A1	1.38641	0.471359	Upregulated	Q02318	GO:0006775,fat-soluble vitamin metabolic process|GO:0046173,polyol biosynthetic process|GO:0019751,polyol metabolic process|GO:0019752,carboxylic acid metabolic process|GO:0006805,xenobiotic metabolic process|GO:0009410,response to xenobiotic stimulus|GO:0006766,vitamin metabolic process|GO:0044281,small molecule metabolic process|GO:0070887,cellular response to chemical stimulus|GO:0044283,small…	GO:0044464,cell part|GO:0031974,membrane-enclosed lumen|GO:0031975,envelope|GO:0043229,intracellular organelle|GO:0043227,membrane-bounded organelle|GO:0043226,organelle|GO:0005737,cytoplasm|GO:0031090,organelle membrane|GO:0070013,intracellular organelle lumen|GO:0016020,membrane|GO:0044444,cytoplasmic part|GO:0005739,mitochondrion|GO:0005759,mitochondrial matrix|GO:0031967,organelle envelope|GO…	GO:0043169,cation binding|GO:0004497,monooxygenase activity|GO:0046872,metal ion binding|GO:0046914,transition metal ion binding|GO:0020037,heme binding|GO:0016709,oxidoreductase activity, acting on paired donors, with incorporation or reduction of molecular oxygen, NAD(P)H as one donor, and incorporation of one atom of oxygen|GO:0031073,cholesterol 26-hydroxylase activity|GO:0097159,organic cycl…	hsa01100,Metabolic pathways|hsa00120,Primary bile acid biosynthesis|hsa03320,PPAR signaling pathway
SFTPA2	1.38641	0.471353	Upregulated	Q8IWL1	GO:0032501,multicellular organismal process|GO:0007585,respiratory gaseous exchange|GO:0044699,single-organism process|GO:0044707,single-multicellular organism process	GO:0043234,protein complex|GO:0032991,macromolecular complex|GO:0005615,extracellular space|GO:0044421,extracellular region part|GO:0031012,extracellular matrix|GO:0005576,extracellular region|GO:0005578,proteinaceous extracellular matrix|GO:0005581,collagen trimer	GO:0030246,carbohydrate binding|GO:0005488,binding	hsa05133,Pertussis|hsa04145,Phagosome
SRSF2	1.38422	0.469074	Upregulated	J3QL05		GO:0005737,cytoplasm|GO:0044446,intracellular organelle part|GO:0043231,intracellular membrane-bounded organelle|GO:0031981,nuclear lumen|GO:0043233,organelle lumen|GO:0005634,nucleus|GO:0044464,cell part|GO:0031974,membrane-enclosed lumen|GO:0005622,intracellular|GO:0005654,nucleoplasm|GO:0070013,intracellular organelle lumen|GO:0043229,intracellular organelle|GO:0044428,nuclear part|GO:0005623,…	GO:0097159,organic cyclic compound binding|GO:0000166,nucleotide binding|GO:0036094,small molecule binding|GO:0005488,binding|GO:0003676,nucleic acid binding|GO:1901363,heterocyclic compound binding|GO:1901265,nucleoside phosphate binding
SLMAP	1.36517	0.449078	Upregulated	Q14BN4	GO:0032501,multicellular organismal process|GO:0006936,muscle contraction|GO:0044707,single-multicellular organism process|GO:0003012,muscle system process|GO:0044699,single-organism process|GO:0003008,system process	GO:0005783,endoplasmic reticulum|GO:0043229,intracellular organelle|GO:0043228,non-membrane-bounded organelle|GO:0031226,intrinsic component of plasma membrane|GO:0043226,organelle|GO:0031224,intrinsic component of membrane|GO:0005856,cytoskeleton|GO:0043227,membrane-bounded organelle|GO:0016021,integral component of membrane|GO:0016020,membrane|GO:0005815,microtubule organizing center|GO:0044430…	GO:0005488,binding|GO:0005515,protein binding
H2AFX	1.35862	0.442142	Upregulated	P16104	GO:0080090,regulation of primary metabolic process|GO:0019222,regulation of metabolic process|GO:0048584,positive regulation of response to stimulus|GO:0048583,regulation of response to stimulus|GO:0060322,head development|GO:0071840,cellular component organization or biogenesis|GO:0044710,single-organism metabolic process|GO:0000003,reproduction|GO:0044419,interspecies interaction between organi…	GO:0031974,membrane-enclosed lumen|GO:0000781,chromosome, telomeric region|GO:0043229,intracellular organelle|GO:0043228,non-membrane-bounded organelle|GO:0000785,chromatin|GO:0000786,nucleosome|GO:0000228,nuclear chromosome|GO:0043227,membrane-bounded organelle|GO:0043226,organelle|GO:0001741,XY body|GO:0070062,extracellular exosome|GO:0031981,nuclear lumen|GO:0005634,nucleus|GO:0000803,sex chro…	GO:0042393,histone binding|GO:0005515,protein binding|GO:0097159,organic cyclic compound binding|GO:0019899,enzyme binding|GO:0003684,damaged DNA binding|GO:0005488,binding|GO:0003676,nucleic acid binding|GO:0003677,DNA binding|GO:0046983,protein dimerization activity|GO:0046982,protein heterodimerization activity|GO:1901363,heterocyclic compound binding	hsa05322,Systemic lupus erythematosus|hsa05034,Alcoholism
ISYNA1	1.35308	0.436243	Upregulated	Q9NPH2	GO:0044237,cellular metabolic process|GO:0046173,polyol biosynthetic process|GO:0019751,polyol metabolic process|GO:0044249,cellular biosynthetic process|GO:0044281,small molecule metabolic process|GO:0044283,small molecule biosynthetic process|GO:0044699,single-organism process|GO:1901576,organic substance biosynthetic process|GO:0044710,single-organism metabolic process|GO:0044711,single-organi…	GO:0005737,cytoplasm|GO:0005829,cytosol|GO:0044464,cell part|GO:0005623,cell|GO:0005622,intracellular|GO:0044444,cytoplasmic part|GO:0044424,intracellular part	GO:0004512,inositol-3-phosphate synthase activity|GO:0016853,isomerase activity|GO:0003824,catalytic activity|GO:0005488,binding|GO:0005515,protein binding|GO:0016872,intramolecular lyase activity	hsa00562,Inositol phosphate metabolism|hsa01100,Metabolic pathways
SUN1	1.33272	0.414372	Upregulated	H0Y742		GO:0016020,membrane|GO:0044464,cell part|GO:0031975,envelope|GO:0043229,intracellular organelle|GO:0031229,intrinsic component of nuclear inner membrane|GO:0031301,integral component of organelle membrane|GO:0031300,intrinsic component of organelle membrane|GO:0043227,membrane-bounded organelle|GO:0043226,organelle|GO:0031224,intrinsic component of membrane|GO:0031090,organelle membrane|GO:000563…
BTD	1.32665	0.407785	Upregulated	P43251	GO:0019752,carboxylic acid metabolic process|GO:0034641,cellular nitrogen compound metabolic process|GO:0032501,multicellular organismal process|GO:0044281,small molecule metabolic process|GO:0044707,single-multicellular organism process|GO:0044699,single-organism process|GO:0007417,central nervous system development|GO:0044710,single-organism metabolic process|GO:0051186,cofactor metabolic proce…	GO:0031974,membrane-enclosed lumen|GO:0043229,intracellular organelle|GO:0043227,membrane-bounded organelle|GO:0043226,organelle|GO:0005737,cytoplasm|GO:0070062,extracellular exosome|GO:0005615,extracellular space|GO:0005739,mitochondrion|GO:0031988,membrane-bounded vesicle|GO:0005759,mitochondrial matrix|GO:1903561,extracellular vesicle|GO:0031982,vesicle|GO:0043230,extracellular organelle|GO:00…	GO:0016787,hydrolase activity|GO:0047708,biotinidase activity|GO:0016810,hydrolase activity, acting on carbon-nitrogen (but not peptide) bonds|GO:0016811,hydrolase activity, acting on carbon-nitrogen (but not peptide) bonds, in linear amides|GO:0003824,catalytic activity	hsa01100,Metabolic pathways|hsa04977,Vitamin digestion and absorption|hsa00780,Biotin metabolism
ACTL6A	1.32206	0.402787	Upregulated	O96019	GO:0033157,regulation of intracellular protein transport|GO:0008104,protein localization|GO:0032388,positive regulation of intracellular transport|GO:0080090,regulation of primary metabolic process|GO:0019222,regulation of metabolic process|GO:0051049,regulation of transport|GO:0032386,regulation of intracellular transport|GO:0072655,establishment of protein localization to mitochondrion|GO:00485…	GO:0033202,DNA helicase complex|GO:0031248,protein acetyltransferase complex|GO:0016020,membrane|GO:0031011,Ino80 complex|GO:0031974,membrane-enclosed lumen|GO:0043229,intracellular organelle|GO:0043228,non-membrane-bounded organelle|GO:0000785,chromatin|GO:0035267,NuA4 histone acetyltransferase complex|GO:1902562,H4 histone acetyltransferase complex|GO:0000228,nuclear chromosome|GO:0043227,membr…	GO:0001012,RNA polymerase II regulatory region DNA binding|GO:0001159,core promoter proximal region DNA binding|GO:0001158,enhancer sequence-specific DNA binding|GO:0031491,nucleosome binding|GO:0031490,chromatin DNA binding|GO:0031492,nucleosomal DNA binding|GO:0044877,macromolecular complex binding|GO:0005488,binding|GO:0003676,nucleic acid binding|GO:0003677,DNA binding|GO:1901363,heterocyclic…
HIST2H3PS2	1.30327	0.382141	Upregulated	Q5TEC6		GO:0044815,DNA packaging complex|GO:0043229,intracellular organelle|GO:0043228,non-membrane-bounded organelle|GO:0000785,chromatin|GO:0000786,nucleosome|GO:0043227,membrane-bounded organelle|GO:0043226,organelle|GO:0005634,nucleus|GO:0005694,chromosome|GO:0043234,protein complex|GO:0032991,macromolecular complex|GO:0043231,intracellular membrane-bounded organelle|GO:0043232,intracellular non-memb…	GO:0003676,nucleic acid binding|GO:0097159,organic cyclic compound binding|GO:0005488,binding|GO:0005515,protein binding|GO:0003677,DNA binding|GO:0046983,protein dimerization activity|GO:0046982,protein heterodimerization activity|GO:1901363,heterocyclic compound binding
EIF4A3	1.30033	0.378877	Upregulated	P38919	GO:0019221,cytokine-mediated signaling pathway|GO:0019222,regulation of metabolic process|GO:0001501,skeletal system development|GO:0007165,signal transduction|GO:0007166,cell surface receptor signaling pathway|GO:0071840,cellular component organization or biogenesis|GO:0080090,regulation of primary metabolic process|GO:0051716,cellular response to stimulus|GO:0010605,negative regulation of macro…	GO:0035145,exon-exon junction complex|GO:0031974,membrane-enclosed lumen|GO:0043229,intracellular organelle|GO:0043227,membrane-bounded organelle|GO:0043226,organelle|GO:0016607,nuclear speck|GO:0016604,nuclear body|GO:0031981,nuclear lumen|GO:0005634,nucleus|GO:0016020,membrane|GO:0030529,ribonucleoprotein complex|GO:0005654,nucleoplasm|GO:0044451,nucleoplasm part|GO:0005737,cytoplasm|GO:0071013…	GO:0016887,ATPase activity|GO:0008026,ATP-dependent helicase activity|GO:0008143,poly(A) binding|GO:0005488,binding|GO:0003676,nucleic acid binding|GO:0008186,RNA-dependent ATPase activity|GO:0043167,ion binding|GO:1901363,heterocyclic compound binding|GO:0001883,purine nucleoside binding|GO:0001882,nucleoside binding|GO:0043168,anion binding|GO:0042623,ATPase activity, coupled|GO:0000166,nucleot…	hsa03015,mRNA surveillance pathway|hsa03013,RNA transport|hsa03040,Spliceosome
DDX46	1.29504	0.372992	Upregulated	A0A0C4DG89	GO:0019222,regulation of metabolic process|GO:0090304,nucleic acid metabolic process|GO:0034641,cellular nitrogen compound metabolic process|GO:0006807,nitrogen compound metabolic process|GO:0044237,cellular metabolic process|GO:0043170,macromolecule metabolic process|GO:0050789,regulation of biological process|GO:1901360,organic cyclic compound metabolic process|GO:0006139,nucleobase-containing …		GO:0016887,ATPase activity|GO:0008026,ATP-dependent helicase activity|GO:0035639,purine ribonucleoside triphosphate binding|GO:0005488,binding|GO:0003676,nucleic acid binding|GO:0008186,RNA-dependent ATPase activity|GO:0043167,ion binding|GO:1901363,heterocyclic compound binding|GO:0001883,purine nucleoside binding|GO:0001882,nucleoside binding|GO:0043168,anion binding|GO:0042623,ATPase activity,…
FAF2	1.28874	0.365966	Upregulated	Q96CS3	GO:0010033,response to organic substance|GO:0008104,protein localization|GO:0009892,negative regulation of metabolic process|GO:0019222,regulation of metabolic process|GO:0051649,establishment of localization in cell|GO:1903513,endoplasmic reticulum to cytosol transport|GO:0036503,ERAD pathway|GO:0044248,cellular catabolic process|GO:0051641,cellular localization|GO:0043632,modification-dependent…	GO:0005811,lipid particle|GO:0005783,endoplasmic reticulum|GO:0005789,endoplasmic reticulum membrane|GO:0042175,nuclear outer membrane-endoplasmic reticulum membrane network|GO:0043229,intracellular organelle|GO:0043228,non-membrane-bounded organelle|GO:0043227,membrane-bounded organelle|GO:0043226,organelle|GO:0005737,cytoplasm|GO:0031090,organelle membrane|GO:0016020,membrane|GO:0044432,endopla…	GO:0035473,lipase binding|GO:0055102,lipase inhibitor activity|GO:0044389,ubiquitin-like protein ligase binding|GO:0030234,enzyme regulator activity|GO:0032182,ubiquitin-like protein binding|GO:0019899,enzyme binding|GO:0031625,ubiquitin protein ligase binding|GO:0043130,ubiquitin binding|GO:0005488,binding|GO:0005515,protein binding|GO:0004857,enzyme inhibitor activity|GO:0098772,molecular funct…
HIST1H3A	1.28454	0.361252	Upregulated	P68431	GO:0007599,hemostasis|GO:0080090,regulation of primary metabolic process|GO:0019222,regulation of metabolic process|GO:0007596,blood coagulation|GO:0048583,regulation of response to stimulus|GO:0007165,signal transduction|GO:1901362,organic cyclic compound biosynthetic process|GO:0031347,regulation of defense response|GO:0050688,regulation of defense response to virus|GO:0006306,DNA methylation|G…	GO:0031974,membrane-enclosed lumen|GO:0044815,DNA packaging complex|GO:0043229,intracellular organelle|GO:0043228,non-membrane-bounded organelle|GO:0000785,chromatin|GO:0000786,nucleosome|GO:0000788,nuclear nucleosome|GO:0000228,nuclear chromosome|GO:0043227,membrane-bounded organelle|GO:0043226,organelle|GO:0070062,extracellular exosome|GO:0031981,nuclear lumen|GO:0005634,nucleus|GO:0016020,memb…	GO:0042393,histone binding|GO:0005515,protein binding|GO:0097159,organic cyclic compound binding|GO:0005488,binding|GO:0003676,nucleic acid binding|GO:0003677,DNA binding|GO:0046983,protein dimerization activity|GO:0046982,protein heterodimerization activity|GO:1901363,heterocyclic compound binding	hsa05322,Systemic lupus erythematosus|hsa05034,Alcoholism|hsa05202,Transcriptional misregulation in cancer
DYNLL2	1.28044	0.356638	Upregulated	Q96FJ2	GO:2001235,positive regulation of apoptotic signaling pathway|GO:0008104,protein localization|GO:0032388,positive regulation of intracellular transport|GO:2001233,regulation of apoptotic signaling pathway|GO:0051049,regulation of transport|GO:0032386,regulation of intracellular transport|GO:0048584,positive regulation of response to stimulus|GO:0048583,regulation of response to stimulus|GO:006102…	GO:0015629,actin cytoskeleton|GO:0043226,organelle|GO:0043229,intracellular organelle|GO:0043228,non-membrane-bounded organelle|GO:0044430,cytoskeletal part|GO:0005874,microtubule|GO:0005929,cilium|GO:0030286,dynein complex|GO:0043227,membrane-bounded organelle|GO:0005875,microtubule associated complex|GO:0005856,cytoskeleton|GO:0072372,primary cilium|GO:0005813,centrosome|GO:0005634,nucleus|GO:0…	GO:0016787,hydrolase activity|GO:0016818,hydrolase activity, acting on acid anhydrides, in phosphorus-containing anhydrides|GO:0003824,catalytic activity|GO:0008092,cytoskeletal protein binding|GO:0016817,hydrolase activity, acting on acid anhydrides|GO:0017111,nucleoside-triphosphatase activity|GO:0016462,pyrophosphatase activity|GO:0005488,binding|GO:0005515,protein binding|GO:0003774,motor act…	hsa04962,Vasopressin-regulated water reabsorption
ACIN1	1.27449	0.349924	Upregulated	E7EQT4		GO:0031974,membrane-enclosed lumen|GO:0043229,intracellular organelle|GO:0071944,cell periphery|GO:0043227,membrane-bounded organelle|GO:0043226,organelle|GO:0005737,cytoplasm|GO:0031981,nuclear lumen|GO:0005634,nucleus|GO:0016020,membrane|GO:0005654,nucleoplasm|GO:0005886,plasma membrane|GO:0043231,intracellular membrane-bounded organelle|GO:0043233,organelle lumen|GO:0044464,cell part|GO:000562…	GO:0097159,organic cyclic compound binding|GO:0000166,nucleotide binding|GO:0036094,small molecule binding|GO:0005488,binding|GO:0003676,nucleic acid binding|GO:1901363,heterocyclic compound binding|GO:1901265,nucleoside phosphate binding
SF3B1	1.27364	0.348961	Upregulated	O75533	GO:0044238,primary metabolic process|GO:0090304,nucleic acid metabolic process|GO:0009790,embryo development|GO:0034641,cellular nitrogen compound metabolic process|GO:0009792,embryo development ending in birth or egg hatching|GO:0044237,cellular metabolic process|GO:0009653,anatomical structure morphogenesis|GO:0007275,multicellular organismal development|GO:0044699,single-organism process|GO:00…	GO:0031974,membrane-enclosed lumen|GO:0043229,intracellular organelle|GO:0043228,non-membrane-bounded organelle|GO:0000785,chromatin|GO:0043227,membrane-bounded organelle|GO:0043226,organelle|GO:0034399,nuclear periphery|GO:0016604,nuclear body|GO:0031981,nuclear lumen|GO:0005634,nucleus|GO:0030529,ribonucleoprotein complex|GO:0005654,nucleoplasm|GO:0044451,nucleoplasm part|GO:0016363,nuclear mat…	GO:0005515,protein binding|GO:0097159,organic cyclic compound binding|GO:0044822,poly(A) RNA binding|GO:0044877,macromolecular complex binding|GO:0003723,RNA binding|GO:0003676,nucleic acid binding|GO:0003682,chromatin binding|GO:1901363,heterocyclic compound binding|GO:0005488,binding	hsa03040,Spliceosome
INPP1	1.2697	0.344484	Upregulated	E7EUX4	GO:0006650,glycerophospholipid metabolic process|GO:0016310,phosphorylation|GO:0044255,cellular lipid metabolic process|GO:0044699,single-organism process|GO:0044710,single-organism metabolic process|GO:0046834,lipid phosphorylation|GO:0071704,organic substance metabolic process|GO:0046854,phosphatidylinositol phosphorylation|GO:0006644,phospholipid metabolic process|GO:0006629,lipid metabolic pr…
IGHM	1.26307	0.336932	Upregulated	A0A087WYJ9	GO:0019220,regulation of phosphate metabolic process|GO:0080090,regulation of primary metabolic process|GO:0019222,regulation of metabolic process|GO:0051049,regulation of transport|GO:0048584,positive regulation of response to stimulus|GO:0048583,regulation of response to stimulus|GO:0032147,activation of protein kinase activity|GO:0007165,signal transduction|GO:0007166,cell surface receptor sig…	GO:0009897,external side of plasma membrane|GO:0071944,cell periphery|GO:0098552,side of membrane|GO:0042571,immunoglobulin complex, circulating|GO:0019815,B cell receptor complex|GO:0019814,immunoglobulin complex|GO:0005737,cytoplasm|GO:0005615,extracellular space|GO:0016020,membrane|GO:0098802,plasma membrane receptor complex|GO:0048471,perinuclear region of cytoplasm|GO:0044459,plasma membrane…	GO:0038023,signaling receptor activity|GO:0004871,signal transducer activity|GO:0060089,molecular transducer activity|GO:0004888,transmembrane signaling receptor activity|GO:0004872,receptor activity|GO:0003823,antigen binding|GO:0005488,binding
CAV1	1.26254	0.336332	Upregulated	Q03135	GO:0007599,hemostasis|GO:0007595,lactation|GO:0051049,regulation of transport|GO:0006907,pinocytosis|GO:0007596,blood coagulation|GO:0043933,macromolecular complex subunit organization|GO:0044281,small molecule metabolic process|GO:0060402,calcium ion transport into cytosol|GO:0032388,positive regulation of intracellular transport|GO:0051651,maintenance of location in cell|GO:0044854,plasma membr…
TXNDC12	1.26252	0.336306	Upregulated	O95881	GO:0019725,cellular homeostasis|GO:0044710,single-organism metabolic process|GO:0009987,cellular process|GO:0050794,regulation of cellular process|GO:0042592,homeostatic process|GO:0044763,single-organism cellular process|GO:0044699,single-organism process|GO:0008152,metabolic process|GO:0065007,biological regulation|GO:0045454,cell redox homeostasis|GO:0065008,regulation of biological quality|GO…	GO:0005737,cytoplasm|GO:0012505,endomembrane system|GO:0005783,endoplasmic reticulum|GO:0044432,endoplasmic reticulum part|GO:0043233,organelle lumen|GO:0044464,cell part|GO:0044444,cytoplasmic part|GO:0031974,membrane-enclosed lumen|GO:0005622,intracellular|GO:0044446,intracellular organelle part|GO:0070013,intracellular organelle lumen|GO:0043229,intracellular organelle|GO:0005788,endoplasmic r…	GO:0019153,protein-disulfide reductase (glutathione) activity|GO:0003824,catalytic activity|GO:0016671,oxidoreductase activity, acting on a sulfur group of donors, disulfide as acceptor|GO:0005488,binding|GO:0005515,protein binding|GO:0016667,oxidoreductase activity, acting on a sulfur group of donors|GO:0016491,oxidoreductase activity	hsa00480,Glutathione metabolism
IGBP1	1.26014	0.333582	Upregulated	P78318	GO:2001234,negative regulation of apoptotic signaling pathway|GO:0019220,regulation of phosphate metabolic process|GO:0080090,regulation of primary metabolic process|GO:0019222,regulation of metabolic process|GO:2001233,regulation of apoptotic signaling pathway|GO:0006470,protein dephosphorylation|GO:0048585,negative regulation of response to stimulus|GO:0048583,regulation of response to stimulus…	GO:0005856,cytoskeleton|GO:0043234,protein complex|GO:0015630,microtubule cytoskeleton|GO:0043228,non-membrane-bounded organelle|GO:0043232,intracellular non-membrane-bounded organelle|GO:0005829,cytosol|GO:0044464,cell part|GO:0044444,cytoplasmic part|GO:0005623,cell|GO:0005737,cytoplasm|GO:0044446,intracellular organelle part|GO:0043229,intracellular organelle|GO:0044430,cytoskeletal part|GO:00…	GO:0051721,protein phosphatase 2A binding|GO:0031434,mitogen-activated protein kinase kinase binding|GO:0019888,protein phosphatase regulator activity|GO:0019208,phosphatase regulator activity|GO:0019899,enzyme binding|GO:0019901,protein kinase binding|GO:0019900,kinase binding|GO:0019903,protein phosphatase binding|GO:0019902,phosphatase binding|GO:0044877,macromolecular complex binding|GO:00199…
IGHD	1.25754	0.330606	Upregulated	A0A0A0MS09	GO:0042127,regulation of cell proliferation|GO:0050865,regulation of cell activation|GO:0050864,regulation of B cell activation|GO:0050867,positive regulation of cell activation|GO:0048583,regulation of response to stimulus|GO:0030888,regulation of B cell proliferation|GO:0032943,mononuclear cell proliferation|GO:0065007,biological regulation|GO:0032946,positive regulation of mononuclear cell pro…	GO:0043234,protein complex|GO:0009897,external side of plasma membrane|GO:0016020,membrane|GO:0032991,macromolecular complex|GO:0043235,receptor complex|GO:0009986,cell surface|GO:0005886,plasma membrane|GO:0044464,cell part|GO:0098802,plasma membrane receptor complex|GO:0005623,cell|GO:0098797,plasma membrane protein complex|GO:0098796,membrane protein complex|GO:0071944,cell periphery|GO:009855…	GO:0005488,binding|GO:0003823,antigen binding
DES	1.25655	0.32947	Upregulated	P17661	GO:0006928,movement of cell or subcellular component|GO:0003012,muscle system process|GO:0060047,heart contraction|GO:0003015,heart process|GO:0050789,regulation of biological process|GO:0044699,single-organism process|GO:0006936,muscle contraction|GO:0044057,regulation of system process|GO:0009987,cellular process|GO:0016043,cellular component organization|GO:0033275,actin-myosin filament slidin…	GO:0030016,myofibril|GO:0030017,sarcomere|GO:0043229,intracellular organelle|GO:0043228,non-membrane-bounded organelle|GO:0045202,synapse|GO:0044424,intracellular part|GO:0043227,membrane-bounded organelle|GO:0043226,organelle|GO:0030018,Z disc|GO:0005856,cytoskeleton|GO:0045111,intermediate filament cytoskeleton|GO:0070062,extracellular exosome|GO:0016020,membrane|GO:0031674,I band|GO:0031988,me…	GO:0005200,structural constituent of cytoskeleton|GO:0008092,cytoskeletal protein binding|GO:0005198,structural molecule activity|GO:0005488,binding|GO:0005515,protein binding|GO:0042802,identical protein binding	hsa05410,Hypertrophic cardiomyopathy (HCM)|hsa05412,Arrhythmogenic right ventricular cardiomyopathy (ARVC)|hsa05414,Dilated cardiomyopathy
H2AFV	1.25648	0.329388	Upregulated	Q71UI9		GO:0044815,DNA packaging complex|GO:0043229,intracellular organelle|GO:0043228,non-membrane-bounded organelle|GO:0000785,chromatin|GO:0000786,nucleosome|GO:0043227,membrane-bounded organelle|GO:0043226,organelle|GO:0031982,vesicle|GO:0005634,nucleus|GO:0031988,membrane-bounded vesicle|GO:0005694,chromosome|GO:0032991,macromolecular complex|GO:1903561,extracellular vesicle|GO:0070062,extracellular…	GO:0003676,nucleic acid binding|GO:0097159,organic cyclic compound binding|GO:0005488,binding|GO:0005515,protein binding|GO:0003677,DNA binding|GO:0046983,protein dimerization activity|GO:0046982,protein heterodimerization activity|GO:1901363,heterocyclic compound binding	hsa05322,Systemic lupus erythematosus|hsa05034,Alcoholism
ANO6	1.25518	0.327892	Upregulated	Q4KMQ2	GO:0043933,macromolecular complex subunit organization|GO:0006909,phagocytosis|GO:0051049,regulation of transport|GO:0048584,positive regulation of response to stimulus|GO:0048583,regulation of response to stimulus|GO:0007610,behavior|GO:0001501,skeletal system development|GO:0007009,plasma membrane organization|GO:0006821,chloride transport|GO:0050920,regulation of chemotaxis|GO:0007165,signal t…	GO:0034707,chloride channel complex|GO:0071944,cell periphery|GO:0034702,ion channel complex|GO:0043227,membrane-bounded organelle|GO:0043226,organelle|GO:0031224,intrinsic component of membrane|GO:0031982,vesicle|GO:0016021,integral component of membrane|GO:0016020,membrane|GO:0031988,membrane-bounded vesicle|GO:1902495,transmembrane transporter complex|GO:0009986,cell surface|GO:1990351,transpo…	GO:0005229,intracellular calcium activated chloride channel activity|GO:0017128,phospholipid scramblase activity|GO:0005261,cation channel activity|GO:0005227,calcium activated cation channel activity|GO:0005488,binding|GO:0005548,phospholipid transporter activity|GO:0046983,protein dimerization activity|GO:0008509,anion transmembrane transporter activity|GO:0015103,inorganic anion transmembrane …
SPAG9	1.25212	0.324377	Upregulated	A0A087X2D8	GO:0019220,regulation of phosphate metabolic process|GO:0080090,regulation of primary metabolic process|GO:0019222,regulation of metabolic process|GO:0048584,positive regulation of response to stimulus|GO:0048583,regulation of response to stimulus|GO:0032147,activation of protein kinase activity|GO:0007165,signal transduction|GO:0023014,signal transduction by protein phosphorylation|GO:0044710,si…	GO:0044464,cell part|GO:0005623,cell|GO:0005622,intracellular	GO:0005488,binding|GO:0008432,JUN kinase binding|GO:0019894,kinesin binding|GO:0030159,receptor signaling complex scaffold activity|GO:0008092,cytoskeletal protein binding|GO:0005078,MAP-kinase scaffold activity|GO:0019899,enzyme binding|GO:0005198,structural molecule activity|GO:0019901,protein kinase binding|GO:0035591,signaling adaptor activity|GO:0019900,kinase binding|GO:0032947,protein comp…
HIST1H4A	1.25203	0.324267	Upregulated	P62805	GO:0080090,regulation of primary metabolic process|GO:0019222,regulation of metabolic process|GO:0060249,anatomical structure homeostasis|GO:0048534,hematopoietic or lymphoid organ development|GO:0031055,chromatin remodeling at centromere|GO:0007165,signal transduction|GO:1901362,organic cyclic compound biosynthetic process|GO:0035574,histone H4-K20 demethylation|GO:0006306,DNA methylation|GO:004…	GO:0031974,membrane-enclosed lumen|GO:0044815,DNA packaging complex|GO:0043229,intracellular organelle|GO:0043228,non-membrane-bounded organelle|GO:0000785,chromatin|GO:0000786,nucleosome|GO:0000228,nuclear chromosome|GO:0043227,membrane-bounded organelle|GO:0043226,organelle|GO:0070062,extracellular exosome|GO:0031981,nuclear lumen|GO:0005634,nucleus|GO:0016020,membrane|GO:0031988,membrane-bound…	GO:0005488,binding|GO:0042393,histone binding|GO:0005515,protein binding|GO:0003824,catalytic activity|GO:0097159,organic cyclic compound binding|GO:0044822,poly(A) RNA binding|GO:0032451,demethylase activity|GO:0032452,histone demethylase activity|GO:0003723,RNA binding|GO:0003676,nucleic acid binding|GO:0003677,DNA binding|GO:0046983,protein dimerization activity|GO:0046982,protein heterodimeri…	hsa05322,Systemic lupus erythematosus|hsa05203,Viral carcinogenesis|hsa05034,Alcoholism
TGM2	1.24824	0.319893	Upregulated	P21980	GO:0006909,phagocytosis|GO:0007165,signal transduction|GO:0098771,inorganic ion homeostasis|GO:0051561,positive regulation of mitochondrial calcium ion concentration|GO:0051560,mitochondrial calcium ion homeostasis|GO:0051716,cellular response to stimulus|GO:0045785,positive regulation of cell adhesion|GO:0048513,organ development|GO:0048518,positive regulation of biological process|GO:0050801,io…	GO:0005783,endoplasmic reticulum|GO:0043229,intracellular organelle|GO:0071944,cell periphery|GO:0005924,cell-substrate adherens junction|GO:0005925,focal adhesion|GO:0043227,membrane-bounded organelle|GO:0043226,organelle|GO:0031224,intrinsic component of membrane|GO:0030055,cell-substrate junction|GO:0005737,cytoplasm|GO:0031982,vesicle|GO:0031226,intrinsic component of plasma membrane|GO:00160…	GO:0043169,cation binding|GO:0003810,protein-glutamine gamma-glutamyltransferase activity|GO:0043167,ion binding|GO:0003824,catalytic activity|GO:0016740,transferase activity|GO:0016746,transferase activity, transferring acyl groups|GO:0005488,binding|GO:0005515,protein binding|GO:0016755,transferase activity, transferring amino-acyl groups|GO:0046872,metal ion binding	hsa05016,Huntington's disease
DNAJC5	1.24596	0.317255	Upregulated	Q9H3Z4	GO:0051648,vesicle localization|GO:0051234,establishment of localization|GO:0006836,neurotransmitter transport|GO:0032940,secretion by cell|GO:0043523,regulation of neuron apoptotic process|GO:0023052,signaling|GO:0001505,regulation of neurotransmitter levels|GO:0008219,cell death|GO:0010941,regulation of cell death|GO:0042981,regulation of apoptotic process|GO:0050789,regulation of biological pr…	GO:0008021,synaptic vesicle|GO:0042995,cell projection|GO:0000323,lytic vacuole|GO:0044421,extracellular region part|GO:0060198,clathrin-sculpted vesicle|GO:0048770,pigment granule|GO:0030424,axon|GO:0043679,axon terminus|GO:0043229,intracellular organelle|GO:0071944,cell periphery|GO:0045202,synapse|GO:0005773,vacuole|GO:0005774,vacuolar membrane|GO:0030135,coated vesicle|GO:0043226,organelle|GO…	GO:0001948,glycoprotein binding|GO:0097367,carbohydrate derivative binding|GO:0005488,binding|GO:0005515,protein binding|GO:0043008,ATP-dependent protein binding	hsa04141,Protein processing in endoplasmic reticulum
CACNA2D1	1.24576	0.317029	Upregulated	P54289	GO:0051049,regulation of transport|GO:0034765,regulation of ion transmembrane transport|GO:0050789,regulation of biological process|GO:0034762,regulation of transmembrane transport|GO:0051234,establishment of localization|GO:0051179,localization|GO:0065007,biological regulation|GO:0043269,regulation of ion transport|GO:0098660,inorganic ion transmembrane transport|GO:0098662,inorganic cation tran…	GO:0005783,endoplasmic reticulum|GO:0034704,calcium channel complex|GO:0005891,voltage-gated calcium channel complex|GO:0034702,ion channel complex|GO:0034703,cation channel complex|GO:1902495,transmembrane transporter complex|GO:0043227,membrane-bounded organelle|GO:0043226,organelle|GO:0031224,intrinsic component of membrane|GO:0005737,cytoplasm|GO:0031982,vesicle|GO:0016021,integral component …	GO:0005261,cation channel activity|GO:0005262,calcium channel activity|GO:0005488,binding|GO:0098772,molecular function regulator|GO:0015085,calcium ion transmembrane transporter activity|GO:0072509,divalent inorganic cation transmembrane transporter activity|GO:0043167,ion binding|GO:0022843,voltage-gated cation channel activity|GO:0016247,channel regulator activity|GO:0022803,passive transmembr…	hsa05414,Dilated cardiomyopathy|hsa04010,MAPK signaling pathway|hsa05410,Hypertrophic cardiomyopathy (HCM)|hsa05412,Arrhythmogenic right ventricular cardiomyopathy (ARVC)|hsa04260,Cardiac muscle contraction|hsa04261,Adrenergic signaling in cardiomyocytes|hsa04921,Oxytocin signaling pathway		D00332,Gabapentin (JAN/USAN/INN); Neurontin (TN); Gralise (TN)|D02716,Pregabalin (JAN/USAN/INN); Lyrica (TN)|D09539,Gabapentin enacarbil (JAN/USAN/INN); Horizant (TN)
PPP2R4	1.24511	0.316273	Upregulated	F6WIT2	GO:0043085,positive regulation of catalytic activity|GO:0009893,positive regulation of metabolic process|GO:0019222,regulation of metabolic process|GO:0043933,macromolecular complex subunit organization|GO:1903047,mitotic cell cycle process|GO:0022402,cell cycle process|GO:0018193,peptidyl-amino acid modification|GO:0050789,regulation of biological process|GO:0044699,single-organism process|GO:00…	GO:0005737,cytoplasm|GO:0043231,intracellular membrane-bounded organelle|GO:0005634,nucleus|GO:0044464,cell part|GO:0005623,cell|GO:0005622,intracellular|GO:0043229,intracellular organelle|GO:0044424,intracellular part|GO:0043227,membrane-bounded organelle|GO:0043226,organelle	GO:0019211,phosphatase activator activity|GO:0016853,isomerase activity|GO:0019208,phosphatase regulator activity|GO:0016859,cis-trans isomerase activity|GO:0003824,catalytic activity|GO:0008047,enzyme activator activity|GO:0003755,peptidyl-prolyl cis-trans isomerase activity|GO:0098772,molecular function regulator|GO:0030234,enzyme regulator activity	hsa04931,Insulin resistance
EPB41L5	1.2421	0.312776	Upregulated	Q9HCM4	GO:0008104,protein localization|GO:2000736,regulation of stem cell differentiation|GO:0019222,regulation of metabolic process|GO:1901890,positive regulation of cell junction assembly|GO:2000738,positive regulation of stem cell differentiation|GO:0048468,cell development|GO:0007160,cell-matrix adhesion|GO:0007162,negative regulation of cell adhesion|GO:0051893,regulation of focal adhesion assembly…	GO:0098590,plasma membrane region|GO:0019898,extrinsic component of membrane|GO:0043229,intracellular organelle|GO:0043228,non-membrane-bounded organelle|GO:0005924,cell-substrate adherens junction|GO:0005925,focal adhesion|GO:0043227,membrane-bounded organelle|GO:0043226,organelle|GO:0030054,cell junction|GO:0030055,cell-substrate junction|GO:0005856,cytoskeleton|GO:0001726,ruffle|GO:0005634,nuc…	GO:0005488,binding|GO:0019904,protein domain specific binding|GO:0005515,protein binding|GO:0008092,cytoskeletal protein binding
WNK1	1.23529	0.304855	Upregulated	F5GWT4	GO:0044267,cellular protein metabolic process|GO:0006468,protein phosphorylation|GO:0044260,cellular macromolecule metabolic process|GO:0044238,primary metabolic process|GO:0019538,protein metabolic process|GO:0016310,phosphorylation|GO:0009987,cellular process|GO:0043412,macromolecule modification|GO:0006464,cellular protein modification process|GO:0043170,macromolecule metabolic process|GO:0071…	GO:0005737,cytoplasm|GO:0044464,cell part|GO:0005623,cell|GO:0005622,intracellular|GO:0044424,intracellular part	GO:0035639,purine ribonucleoside triphosphate binding|GO:0004672,protein kinase activity|GO:0043167,ion binding|GO:1901363,heterocyclic compound binding|GO:0001883,purine nucleoside binding|GO:0001882,nucleoside binding|GO:0043168,anion binding|GO:0000166,nucleotide binding|GO:0004674,protein serine/threonine kinase activity|GO:0016740,transferase activity|GO:1901265,nucleoside phosphate binding|…
TUBB	1.23363	0.302915	Upregulated	P07437	GO:0022607,cellular component assembly|GO:0044839,cell cycle G2/M phase transition|GO:0070271,protein complex biogenesis|GO:0000086,G2/M transition of mitotic cell cycle|GO:0006955,immune response|GO:1903047,mitotic cell cycle process|GO:0006928,movement of cell or subcellular component|GO:0044770,cell cycle phase transition|GO:0044772,mitotic cell cycle phase transition|GO:0022402,cell cycle pro…	GO:0035770,ribonucleoprotein granule|GO:0044421,extracellular region part|GO:0031970,organelle envelope lumen|GO:0031974,membrane-enclosed lumen|GO:0031975,envelope|GO:0043229,intracellular organelle|GO:0043228,non-membrane-bounded organelle|GO:0036464,cytoplasmic ribonucleoprotein granule|GO:0030529,ribonucleoprotein complex|GO:0005874,microtubule|GO:0043226,organelle|GO:0005856,cytoskeleton|GO:…	GO:0005200,structural constituent of cytoskeleton|GO:0044389,ubiquitin-like protein ligase binding|GO:0035639,purine ribonucleoside triphosphate binding|GO:0032794,GTPase activating protein binding|GO:0019899,enzyme binding|GO:0044877,macromolecular complex binding|GO:0005488,binding|GO:0000166,nucleotide binding|GO:1901363,heterocyclic compound binding|GO:0001883,purine nucleoside binding|GO:000…	hsa05130,Pathogenic Escherichia coli infection|hsa04145,Phagosome|hsa04540,Gap junction		D00491,Paclitaxel (JAN/USP/INN); Abraxane (TN); Taxol (TN)|D00570,Colchicine (JP16/USP); Colchicine (TN)|D01068,Vinblastine sulfate (JP16/USP); Exal (TN); Velban (TN)|D01769,Vindesine sulfate (JAN/USAN); Fildesin (TN)|D01935,Vinorelbine ditartrate (JAN); Vinorelbine tartrate (USP); KW 2307; Navelbine (TN)|D02165,Docetaxel hydrate (JP16); Docetaxel (USAN); Docetaxel injection (JP16); Docetaxel for…
HDHD2	1.22784	0.296117	Upregulated	K7ER15
YKT6	1.22648	0.294524	Upregulated	O15498	GO:0008104,protein localization|GO:0008152,metabolic process|GO:0051648,vesicle localization|GO:0006904,vesicle docking involved in exocytosis|GO:0006906,vesicle fusion|GO:0006903,vesicle targeting|GO:0061025,membrane fusion|GO:0061024,membrane organization|GO:0032940,secretion by cell|GO:0051641,cellular localization|GO:0051640,organelle localization|GO:0051656,establishment of organelle localiz…	GO:0005783,endoplasmic reticulum|GO:0043229,intracellular organelle|GO:0071944,cell periphery|GO:0031201,SNARE complex|GO:0005622,intracellular|GO:0043227,membrane-bounded organelle|GO:0043226,organelle|GO:0031224,intrinsic component of membrane|GO:0005737,cytoplasm|GO:0070062,extracellular exosome|GO:0016023,cytoplasmic membrane-bounded vesicle|GO:0031410,cytoplasmic vesicle|GO:0016021,integral …	GO:0003824,catalytic activity|GO:0000149,SNARE binding|GO:0016417,S-acyltransferase activity|GO:0016740,transferase activity|GO:0016746,transferase activity, transferring acyl groups|GO:0016747,transferase activity, transferring acyl groups other than amino-acyl groups|GO:0005515,protein binding|GO:0005484,SNAP receptor activity|GO:0019707,protein-cysteine S-acyltransferase activity|GO:0019706,pr…	hsa04130,SNARE interactions in vesicular transport
COX5A	1.22514	0.29295	Upregulated	P20674	GO:0009167,purine ribonucleoside monophosphate metabolic process|GO:0044281,small molecule metabolic process|GO:0009161,ribonucleoside monophosphate metabolic process|GO:1901362,organic cyclic compound biosynthetic process|GO:1901360,organic cyclic compound metabolic process|GO:0044710,single-organism metabolic process|GO:0009199,ribonucleoside triphosphate metabolic process|GO:0022900,electron t…	GO:0044464,cell part|GO:0031975,envelope|GO:0043229,intracellular organelle|GO:0070069,cytochrome complex|GO:0031988,membrane-bounded vesicle|GO:0043227,membrane-bounded organelle|GO:0043226,organelle|GO:0005737,cytoplasm|GO:0005751,mitochondrial respiratory chain complex IV|GO:0031982,vesicle|GO:0098796,membrane protein complex|GO:0043209,myelin sheath|GO:0016020,membrane|GO:0098803,respiratory …	GO:0005488,binding|GO:0016491,oxidoreductase activity|GO:0043169,cation binding|GO:0015077,monovalent inorganic cation transmembrane transporter activity|GO:0043167,ion binding|GO:0046872,metal ion binding|GO:0015002,heme-copper terminal oxidase activity|GO:0004129,cytochrome-c oxidase activity|GO:0005215,transporter activity|GO:0008324,cation transmembrane transporter activity|GO:0003824,catalyt…	hsa00190,Oxidative phosphorylation|hsa04260,Cardiac muscle contraction|hsa01100,Metabolic pathways|hsa04932,Non-alcoholic fatty liver disease (NAFLD)|hsa05016,Huntington's disease|hsa05010,Alzheimer's disease|hsa05012,Parkinson's disease
SLC9A3R2	1.22327	0.290739	Upregulated	Q15599	GO:0042391,regulation of membrane potential|GO:0022607,cellular component assembly|GO:0070271,protein complex biogenesis|GO:0043933,macromolecular complex subunit organization|GO:0044699,single-organism process|GO:0007275,multicellular organismal development|GO:0071840,cellular component organization or biogenesis|GO:0071822,protein complex subunit organization|GO:0016043,cellular component organ…	GO:0098590,plasma membrane region|GO:0044421,extracellular region part|GO:0043229,intracellular organelle|GO:0071944,cell periphery|GO:0005924,cell-substrate adherens junction|GO:0005925,focal adhesion|GO:0043227,membrane-bounded organelle|GO:0043226,organelle|GO:0030054,cell junction|GO:0030055,cell-substrate junction|GO:0005737,cytoplasm|GO:0045177,apical part of cell|GO:0031982,vesicle|GO:0005…	GO:0005488,binding|GO:0008022,protein C-terminus binding|GO:0070325,lipoprotein particle receptor binding|GO:0019899,enzyme binding|GO:0008013,beta-catenin binding|GO:0005198,structural molecule activity|GO:0030165,PDZ domain binding|GO:0019902,phosphatase binding|GO:0032947,protein complex scaffold|GO:0005515,protein binding|GO:0016247,channel regulator activity|GO:0005102,receptor binding|GO:00…	hsa04960,Aldosterone-regulated sodium reabsorption
FKBP4	1.22286	0.290255	Upregulated	Q02790	GO:0031110,regulation of microtubule polymerization or depolymerization|GO:0031111,negative regulation of microtubule polymerization or depolymerization|GO:0031113,regulation of microtubule polymerization|GO:0031115,negative regulation of microtubule polymerization|GO:0034605,cellular response to heat|GO:0048583,regulation of response to stimulus|GO:0043933,macromolecular complex subunit organiza…	GO:0005783,endoplasmic reticulum|GO:0030427,site of polarized growth|GO:0030426,growth cone|GO:0031974,membrane-enclosed lumen|GO:0005789,endoplasmic reticulum membrane|GO:0042175,nuclear outer membrane-endoplasmic reticulum membrane network|GO:0043229,intracellular organelle|GO:0043228,non-membrane-bounded organelle|GO:0005874,microtubule|GO:0043226,organelle|GO:0005856,cytoskeleton|GO:0042995,c…	GO:0035639,purine ribonucleoside triphosphate binding|GO:0031072,heat shock protein binding|GO:0008144,drug binding|GO:0005488,binding|GO:0003676,nucleic acid binding|GO:0043167,ion binding|GO:1901363,heterocyclic compound binding|GO:0001883,purine nucleoside binding|GO:0001882,nucleoside binding|GO:0043168,anion binding|GO:0000166,nucleotide binding|GO:0032561,guanyl ribonucleotide binding|GO:00…	hsa04915,Estrogen signaling pathway
SURF4	1.22192	0.289153	Upregulated	Q5T8U5		GO:0044425,membrane part|GO:0016021,integral component of membrane|GO:0016020,membrane|GO:0031224,intrinsic component of membrane
ACTB	1.21455	0.28042	Upregulated	P60709	GO:0006909,phagocytosis|GO:0007409,axonogenesis|GO:0060249,anatomical structure homeostasis|GO:0048584,positive regulation of response to stimulus|GO:0048583,regulation of response to stimulus|GO:0061024,membrane organization|GO:0060322,head development|GO:0007165,signal transduction|GO:0007166,cell surface receptor signaling pathway|GO:0007167,enzyme linked receptor protein signaling pathway|GO:…	GO:0031248,protein acetyltransferase complex|GO:0016020,membrane|GO:0035770,ribonucleoprotein granule|GO:0005924,cell-substrate adherens junction|GO:0031974,membrane-enclosed lumen|GO:0005623,cell|GO:0043229,intracellular organelle|GO:0043228,non-membrane-bounded organelle|GO:0000785,chromatin|GO:0035267,NuA4 histone acetyltransferase complex|GO:1902562,H4 histone acetyltransferase complex|GO:000…	GO:0019894,kinesin binding|GO:0019899,enzyme binding|GO:0005200,structural constituent of cytoskeleton|GO:0035639,purine ribonucleoside triphosphate binding|GO:0001012,RNA polymerase II regulatory region DNA binding|GO:0001159,core promoter proximal region DNA binding|GO:0001158,enhancer sequence-specific DNA binding|GO:0031491,nucleosome binding|GO:0031490,chromatin DNA binding|GO:0031492,nucleo…	hsa05132,Salmonella infection|hsa05131,Shigellosis|hsa05130,Pathogenic Escherichia coli infection|hsa04611,Platelet activation|hsa04530,Tight junction|hsa04670,Leukocyte transendothelial migration|hsa04145,Phagosome|hsa04510,Focal adhesion|hsa05410,Hypertrophic cardiomyopathy (HCM)|hsa05412,Arrhythmogenic right ventricular cardiomyopathy (ARVC)|hsa05414,Dilated cardiomyopathy|hsa04921,Oxytocin si…
ACTG1	1.21455	0.28042	Upregulated	P63261	GO:0007599,hemostasis|GO:0007409,axonogenesis|GO:0060249,anatomical structure homeostasis|GO:0048584,positive regulation of response to stimulus|GO:0048583,regulation of response to stimulus|GO:0061024,membrane organization|GO:0007165,signal transduction|GO:0007166,cell surface receptor signaling pathway|GO:0007167,enzyme linked receptor protein signaling pathway|GO:0007169,transmembrane receptor…	GO:0015629,actin cytoskeleton|GO:0030016,myofibril|GO:0043229,intracellular organelle|GO:0043228,non-membrane-bounded organelle|GO:0005924,cell-substrate adherens junction|GO:0005925,focal adhesion|GO:0043227,membrane-bounded organelle|GO:0043226,organelle|GO:0030054,cell junction|GO:0030055,cell-substrate junction|GO:0005856,cytoskeleton|GO:0031982,vesicle|GO:0043209,myelin sheath|GO:0005615,ext…	GO:0005200,structural constituent of cytoskeleton|GO:0044389,ubiquitin-like protein ligase binding|GO:0035639,purine ribonucleoside triphosphate binding|GO:0019899,enzyme binding|GO:0005488,binding|GO:0005198,structural molecule activity|GO:1901363,heterocyclic compound binding|GO:1901265,nucleoside phosphate binding|GO:0001882,nucleoside binding|GO:0043168,anion binding|GO:0043167,ion binding|GO…	hsa05132,Salmonella infection|hsa05131,Shigellosis|hsa05130,Pathogenic Escherichia coli infection|hsa04611,Platelet activation|hsa04530,Tight junction|hsa04670,Leukocyte transendothelial migration|hsa04145,Phagosome|hsa04510,Focal adhesion|hsa05410,Hypertrophic cardiomyopathy (HCM)|hsa05412,Arrhythmogenic right ventricular cardiomyopathy (ARVC)|hsa05414,Dilated cardiomyopathy|hsa04921,Oxytocin si…
CD74	1.21205	0.277452	Upregulated	H0YBZ2	GO:0033036,macromolecule localization|GO:0019882,antigen processing and presentation|GO:0034613,cellular protein localization|GO:0046907,intracellular transport|GO:0070727,cellular macromolecule localization|GO:0050896,response to stimulus|GO:0006886,intracellular protein transport|GO:0006810,transport|GO:0045184,establishment of protein localization|GO:0002376,immune system process|GO:0008104,pr…	GO:0016020,membrane|GO:0044464,cell part|GO:0005623,cell|GO:0005622,intracellular	GO:0042289,MHC class II protein binding|GO:0042287,MHC protein binding|GO:0005488,binding|GO:0005515,protein binding|GO:0005102,receptor binding
UBE2D3	1.21109	0.276301	Upregulated	H9KV45	GO:0008152,metabolic process		GO:0003824,catalytic activity|GO:0016874,ligase activity
ITGA1	1.20936	0.274244	Upregulated	P56199	GO:0019220,regulation of phosphate metabolic process|GO:0080090,regulation of primary metabolic process|GO:0019222,regulation of metabolic process|GO:0006470,protein dephosphorylation|GO:0048585,negative regulation of response to stimulus|GO:0048584,positive regulation of response to stimulus|GO:0048583,regulation of response to stimulus|GO:0032147,activation of protein kinase activity|GO:0007160…	GO:0009897,external side of plasma membrane|GO:0098636,protein complex involved in cell adhesion|GO:0097223,sperm part|GO:0044421,extracellular region part|GO:0045178,basal part of cell|GO:0043229,intracellular organelle|GO:0071944,cell periphery|GO:0001669,acrosomal vesicle|GO:0098552,side of membrane|GO:0005924,cell-substrate adherens junction|GO:0005925,focal adhesion|GO:0043227,membrane-bound…	GO:0098634,protein binding involved in cell-matrix adhesion|GO:0043169,cation binding|GO:0005518,collagen binding|GO:0098631,protein binding involved in cell adhesion|GO:0098639,collagen binding involved in cell-matrix adhesion|GO:0019899,enzyme binding|GO:0043167,ion binding|GO:0019903,protein phosphatase binding|GO:0019902,phosphatase binding|GO:0044877,macromolecular complex binding|GO:0005488…	hsa04510,Focal adhesion|hsa04512,ECM-receptor interaction|hsa04640,Hematopoietic cell lineage|hsa05410,Hypertrophic cardiomyopathy (HCM)|hsa05412,Arrhythmogenic right ventricular cardiomyopathy (ARVC)|hsa04151,PI3K-Akt signaling pathway|hsa05414,Dilated cardiomyopathy|hsa04810,Regulation of actin cytoskeleton
HTATIP2	1.20735	0.271848	Upregulated	Q9BUP3	GO:0051169,nuclear transport|GO:0080090,regulation of primary metabolic process|GO:0019222,regulation of metabolic process|GO:0072359,circulatory system development|GO:0072358,cardiovascular system development|GO:1901362,organic cyclic compound biosynthetic process|GO:1901360,organic cyclic compound metabolic process|GO:0044710,single-organism metabolic process|GO:0048869,cellular developmental p…	GO:0005737,cytoplasm|GO:0016020,membrane|GO:0043231,intracellular membrane-bounded organelle|GO:0005634,nucleus|GO:0005635,nuclear envelope|GO:0044464,cell part|GO:0031967,organelle envelope|GO:0031975,envelope|GO:0044446,intracellular organelle part|GO:0043229,intracellular organelle|GO:0044428,nuclear part|GO:0012505,endomembrane system|GO:0044424,intracellular part|GO:0005623,cell|GO:0005622,i…	GO:0000989,transcription factor activity, transcription factor binding|GO:0003713,transcription coactivator activity|GO:0003712,transcription cofactor activity|GO:0003824,catalytic activity|GO:0005488,binding|GO:0005515,protein binding|GO:0000988,transcription factor activity, protein binding|GO:0016491,oxidoreductase activity
TSG101	1.20709	0.271532	Upregulated	F5H442	GO:0044267,cellular protein metabolic process|GO:0033036,macromolecule localization|GO:0006810,transport|GO:0044260,cellular macromolecule metabolic process|GO:0044238,primary metabolic process|GO:0019538,protein metabolic process|GO:0008104,protein localization|GO:0009987,cellular process|GO:0044237,cellular metabolic process|GO:0043170,macromolecule metabolic process|GO:0045184,establishment of…	GO:0031974,membrane-enclosed lumen|GO:0043229,intracellular organelle|GO:0071944,cell periphery|GO:0043227,membrane-bounded organelle|GO:0043226,organelle|GO:0005737,cytoplasm|GO:0031981,nuclear lumen|GO:0005730,nucleolus|GO:0005634,nucleus|GO:0016020,membrane|GO:0005886,plasma membrane|GO:0043231,intracellular membrane-bounded organelle|GO:0043232,intracellular non-membrane-bounded organelle|GO:…
TUBB2A	1.20475	0.268728	Upregulated	Q13885	GO:0022607,cellular component assembly|GO:0006457,protein folding|GO:0070271,protein complex biogenesis|GO:0043933,macromolecular complex subunit organization|GO:0006458,'de novo' protein folding|GO:0034622,cellular macromolecular complex assembly|GO:0071840,cellular component organization or biogenesis|GO:0044267,cellular protein metabolic process|GO:0044260,cellular macromolecule metabolic proc…	GO:0043229,intracellular organelle|GO:0043228,non-membrane-bounded organelle|GO:0005874,microtubule|GO:0043226,organelle|GO:0005856,cytoskeleton|GO:0031982,vesicle|GO:0043227,membrane-bounded organelle|GO:0005634,nucleus|GO:0031988,membrane-bounded vesicle|GO:0044430,cytoskeletal part|GO:0005737,cytoplasm|GO:0015630,microtubule cytoskeleton|GO:0032991,macromolecular complex|GO:1903561,extracellul…	GO:0005200,structural constituent of cytoskeleton|GO:0035639,purine ribonucleoside triphosphate binding|GO:0005488,binding|GO:0005198,structural molecule activity|GO:1901363,heterocyclic compound binding|GO:1901265,nucleoside phosphate binding|GO:0001882,nucleoside binding|GO:0043168,anion binding|GO:0016462,pyrophosphatase activity|GO:0000166,nucleotide binding|GO:0032561,guanyl ribonucleotide b…	hsa05130,Pathogenic Escherichia coli infection|hsa04145,Phagosome|hsa04540,Gap junction		D00491,Paclitaxel (JAN/USP/INN); Abraxane (TN); Taxol (TN)|D00570,Colchicine (JP16/USP); Colchicine (TN)|D01068,Vinblastine sulfate (JP16/USP); Exal (TN); Velban (TN)|D01769,Vindesine sulfate (JAN/USAN); Fildesin (TN)|D01935,Vinorelbine ditartrate (JAN); Vinorelbine tartrate (USP); KW 2307; Navelbine (TN)|D02165,Docetaxel hydrate (JP16); Docetaxel (USAN); Docetaxel injection (JP16); Docetaxel for…
TPSAB1	0.829138	-0.270316	Downregulated	J3QTS8	GO:0044238,primary metabolic process|GO:0019538,protein metabolic process|GO:0043170,macromolecule metabolic process|GO:0071704,organic substance metabolic process|GO:0008152,metabolic process|GO:0006508,proteolysis		GO:0004252,serine-type endopeptidase activity|GO:0004175,endopeptidase activity|GO:0017171,serine hydrolase activity|GO:0016787,hydrolase activity|GO:0003824,catalytic activity|GO:0070011,peptidase activity, acting on L-amino acid peptides|GO:0008233,peptidase activity|GO:0008236,serine-type peptidase activity
HSDL2	0.827161	-0.273759	Downregulated	Q6YN16	GO:0008152,metabolic process|GO:0044710,single-organism metabolic process|GO:0044699,single-organism process|GO:0055114,oxidation-reduction process	GO:0005737,cytoplasm|GO:0043231,intracellular membrane-bounded organelle|GO:0044464,cell part|GO:0016020,membrane|GO:0005777,peroxisome|GO:0044444,cytoplasmic part|GO:0005739,mitochondrion|GO:0005622,intracellular|GO:0042579,microbody|GO:0043229,intracellular organelle|GO:0005623,cell|GO:0044424,intracellular part|GO:0043227,membrane-bounded organelle|GO:0043226,organelle	GO:0003824,catalytic activity|GO:0016491,oxidoreductase activity
RPS13	0.824885	-0.277734	Downregulated	P62277	GO:0008104,protein localization|GO:0080090,regulation of primary metabolic process|GO:0019222,regulation of metabolic process|GO:0061024,membrane organization|GO:1901362,organic cyclic compound biosynthetic process|GO:0071840,cellular component organization or biogenesis|GO:1901361,organic cyclic compound catabolic process|GO:0010605,negative regulation of macromolecule metabolic process|GO:00707…	GO:0022626,cytosolic ribosome|GO:0022627,cytosolic small ribosomal subunit|GO:0031974,membrane-enclosed lumen|GO:0043229,intracellular organelle|GO:0043228,non-membrane-bounded organelle|GO:0005924,cell-substrate adherens junction|GO:0005925,focal adhesion|GO:0043227,membrane-bounded organelle|GO:0043226,organelle|GO:0030054,cell junction|GO:0015935,small ribosomal subunit|GO:0005737,cytoplasm|GO…	GO:0005488,binding|GO:0070181,small ribosomal subunit rRNA binding|GO:0005515,protein binding|GO:0097159,organic cyclic compound binding|GO:0044822,poly(A) RNA binding|GO:0019843,rRNA binding|GO:0003735,structural constituent of ribosome|GO:0003723,RNA binding|GO:0003676,nucleic acid binding|GO:0005198,structural molecule activity|GO:1901363,heterocyclic compound binding|GO:0003729,mRNA binding	hsa03010,Ribosome
TMED7-TICAM2	0.824795	-0.277892	Downregulated	A0A0A6YYA0	GO:0006810,transport|GO:0051179,localization|GO:0051234,establishment of localization	GO:0044425,membrane part|GO:0016021,integral component of membrane|GO:0016020,membrane|GO:0031224,intrinsic component of membrane
APOD	0.824733	-0.278	Downregulated	C9JF17	GO:0006810,transport|GO:0051179,localization|GO:0051234,establishment of localization	GO:0005576,extracellular region	GO:0036094,small molecule binding|GO:0005215,transporter activity|GO:0008289,lipid binding|GO:0005488,binding
GPNMB	0.824348	-0.278675	Downregulated	Q14956	GO:0032502,developmental process|GO:0032640,tumor necrosis factor production|GO:0030154,cell differentiation|GO:0001503,ossification|GO:1903556,negative regulation of tumor necrosis factor superfamily cytokine production|GO:1903555,regulation of tumor necrosis factor superfamily cytokine production|GO:0030282,bone mineralization|GO:0001649,osteoblast differentiation|GO:0001816,cytokine production…	GO:0048770,pigment granule|GO:0043229,intracellular organelle|GO:0071944,cell periphery|GO:0031226,intrinsic component of plasma membrane|GO:0043226,organelle|GO:0031224,intrinsic component of membrane|GO:0005737,cytoplasm|GO:0031982,vesicle|GO:0016023,cytoplasmic membrane-bounded vesicle|GO:0031410,cytoplasmic vesicle|GO:0016021,integral component of membrane|GO:0016020,membrane|GO:0031988,membr…	GO:0043168,anion binding|GO:0005178,integrin binding|GO:0050839,cell adhesion molecule binding|GO:0097367,carbohydrate derivative binding|GO:1901681,sulfur compound binding|GO:0005539,glycosaminoglycan binding|GO:0044877,macromolecular complex binding|GO:0005488,binding|GO:0005515,protein binding|GO:0032403,protein complex binding|GO:0005102,receptor binding|GO:0043167,ion binding|GO:0008201,hepa…			D09623,Glembatumumab (USAN/INN)|D09912,Glembatumumab vedotin (USAN)
SAMM50	0.824214	-0.278909	Downregulated	Q9Y512	GO:0022607,cellular component assembly|GO:0070271,protein complex biogenesis|GO:0043933,macromolecular complex subunit organization|GO:0034622,cellular macromolecular complex assembly|GO:0008104,protein localization|GO:0061024,membrane organization|GO:0007008,outer mitochondrial membrane organization|GO:0051641,cellular localization|GO:0042407,cristae formation|GO:0007005,mitochondrion organizati…	GO:0044421,extracellular region part|GO:0044464,cell part|GO:0031090,organelle membrane|GO:0031975,envelope|GO:0043229,intracellular organelle|GO:0043227,membrane-bounded organelle|GO:0043226,organelle|GO:0031224,intrinsic component of membrane|GO:0005737,cytoplasm|GO:0031982,vesicle|GO:0098796,membrane protein complex|GO:0016021,integral component of membrane|GO:0016020,membrane|GO:0044444,cytop…	GO:0005488,binding|GO:0005515,protein binding
CALU	0.824167	-0.278992	Downregulated	O43852	GO:0032502,developmental process|GO:0010033,response to organic substance|GO:0009892,negative regulation of metabolic process|GO:0019222,regulation of metabolic process|GO:0030030,cell projection organization|GO:0030154,cell differentiation|GO:0048468,cell development|GO:0048678,response to axon injury|GO:0032940,secretion by cell|GO:0032501,multicellular organismal process|GO:0051641,cellular lo…	GO:0005783,endoplasmic reticulum|GO:0048770,pigment granule|GO:0031974,membrane-enclosed lumen|GO:0043229,intracellular organelle|GO:0043227,membrane-bounded organelle|GO:0043226,organelle|GO:0005737,cytoplasm|GO:0031982,vesicle|GO:0016023,cytoplasmic membrane-bounded vesicle|GO:0031410,cytoplasmic vesicle|GO:0016020,membrane|GO:0016528,sarcoplasm|GO:0031988,membrane-bounded vesicle|GO:0044432,en…	GO:0043169,cation binding|GO:0098772,molecular function regulator|GO:0030234,enzyme regulator activity|GO:0019899,enzyme binding|GO:0043167,ion binding|GO:0005509,calcium ion binding|GO:0005515,protein binding|GO:0004857,enzyme inhibitor activity|GO:0046872,metal ion binding|GO:0005488,binding
UQCRB	0.822696	-0.281569	Downregulated	P14927	GO:0009141,nucleoside triphosphate metabolic process|GO:0009144,purine nucleoside triphosphate metabolic process|GO:0009167,purine ribonucleoside monophosphate metabolic process|GO:0034641,cellular nitrogen compound metabolic process|GO:0009060,aerobic respiration|GO:0044281,small molecule metabolic process|GO:0009161,ribonucleoside monophosphate metabolic process|GO:0009123,nucleoside monophosph…	GO:0044464,cell part|GO:1990204,oxidoreductase complex|GO:0043229,intracellular organelle|GO:0070069,cytochrome complex|GO:0043227,membrane-bounded organelle|GO:0043226,organelle|GO:0031224,intrinsic component of membrane|GO:0005737,cytoplasm|GO:0031090,organelle membrane|GO:0098796,membrane protein complex|GO:0016021,integral component of membrane|GO:0016020,membrane|GO:0098803,respiratory chain…	GO:0005488,binding|GO:0005515,protein binding	hsa00190,Oxidative phosphorylation|hsa04260,Cardiac muscle contraction|hsa01100,Metabolic pathways|hsa04932,Non-alcoholic fatty liver disease (NAFLD)|hsa05016,Huntington's disease|hsa05010,Alzheimer's disease|hsa05012,Parkinson's disease
BGN	0.821407	-0.283832	Downregulated	P21810	GO:0030207,chondroitin sulfate catabolic process|GO:0030206,chondroitin sulfate biosynthetic process|GO:0030205,dermatan sulfate metabolic process|GO:0030204,chondroitin sulfate metabolic process|GO:0030203,glycosaminoglycan metabolic process|GO:0044237,cellular metabolic process|GO:0048771,tissue remodeling|GO:0019752,carboxylic acid metabolic process|GO:0030208,dermatan sulfate biosynthetic pro…	GO:0000323,lytic vacuole|GO:0044421,extracellular region part|GO:0031974,membrane-enclosed lumen|GO:0031012,extracellular matrix|GO:0043229,intracellular organelle|GO:0071944,cell periphery|GO:0005773,vacuole|GO:0030133,transport vesicle|GO:0043227,membrane-bounded organelle|GO:0043226,organelle|GO:0005737,cytoplasm|GO:0005764,lysosome|GO:0043202,lysosomal lumen|GO:0070062,extracellular exosome|G…	GO:0005201,extracellular matrix structural constituent|GO:0050840,extracellular matrix binding|GO:0097367,carbohydrate derivative binding|GO:0005198,structural molecule activity|GO:0005539,glycosaminoglycan binding|GO:0005488,binding
CPQ	0.821406	-0.283833	Downregulated	Q9Y646	GO:0048589,developmental growth|GO:0006590,thyroid hormone generation|GO:0044248,cellular catabolic process|GO:0034641,cellular nitrogen compound metabolic process|GO:0042403,thyroid hormone metabolic process|GO:0044237,cellular metabolic process|GO:0044699,single-organism process|GO:0042445,hormone metabolic process|GO:1901575,organic substance catabolic process|GO:0040007,growth|GO:0031099,rege…	GO:0000323,lytic vacuole|GO:0005783,endoplasmic reticulum|GO:0043229,intracellular organelle|GO:0043227,membrane-bounded organelle|GO:0043226,organelle|GO:0005737,cytoplasm|GO:0031982,vesicle|GO:0005773,vacuole|GO:0005615,extracellular space|GO:0031988,membrane-bounded vesicle|GO:0005794,Golgi apparatus|GO:0012505,endomembrane system|GO:1903561,extracellular vesicle|GO:0070062,extracellular exoso…	GO:0005488,binding|GO:0016787,hydrolase activity|GO:0005515,protein binding|GO:0003824,catalytic activity|GO:0004180,carboxypeptidase activity|GO:0016805,dipeptidase activity|GO:0043169,cation binding|GO:0043167,ion binding|GO:0008238,exopeptidase activity|GO:0070011,peptidase activity, acting on L-amino acid peptides|GO:0042802,identical protein binding|GO:0070573,metallodipeptidase activity|GO:…
PACSIN3	0.818021	-0.28979	Downregulated	A0A0C4DGG1	GO:0051049,regulation of transport|GO:0051128,regulation of cellular component organization|GO:0061024,membrane organization|GO:0007009,plasma membrane organization|GO:0050789,regulation of biological process|GO:0071840,cellular component organization or biogenesis|GO:0051234,establishment of localization|GO:0010256,endomembrane system organization|GO:0016043,cellular component organization|GO:00…	GO:0005737,cytoplasm|GO:0043231,intracellular membrane-bounded organelle|GO:0005768,endosome|GO:0044464,cell part|GO:0044444,cytoplasmic part|GO:0005623,cell|GO:0031988,membrane-bounded vesicle|GO:0043229,intracellular organelle|GO:0012505,endomembrane system|GO:0044424,intracellular part|GO:0005622,intracellular|GO:0043227,membrane-bounded organelle|GO:0043226,organelle|GO:0031982,vesicle	GO:0043168,anion binding|GO:0008092,cytoskeletal protein binding|GO:0005543,phospholipid binding|GO:0008289,lipid binding|GO:0043167,ion binding|GO:0005488,binding|GO:0005515,protein binding
TACSTD2	0.817985	-0.289853	Downregulated	P09758	GO:2000736,regulation of stem cell differentiation|GO:0034446,substrate adhesion-dependent cell spreading|GO:2000738,positive regulation of stem cell differentiation|GO:0048468,cell development|GO:0060491,regulation of cell projection assembly|GO:0007165,signal transduction|GO:0007166,cell surface receptor signaling pathway|GO:0032989,cellular component morphogenesis|GO:0031345,negative regulatio…	GO:0098590,plasma membrane region|GO:0044421,extracellular region part|GO:0043229,intracellular organelle|GO:0071944,cell periphery|GO:0031226,intrinsic component of plasma membrane|GO:0043226,organelle|GO:0031224,intrinsic component of membrane|GO:0005737,cytoplasm|GO:0031982,vesicle|GO:0043227,membrane-bounded organelle|GO:0016021,integral component of membrane|GO:0016020,membrane|GO:0045178,ba…	GO:0060089,molecular transducer activity|GO:0004872,receptor activity|GO:0005515,protein binding|GO:0005488,binding
NACA	0.812394	-0.299749	Downregulated	H0YHX9
IGHV1-46	0.812033	-0.30039	Downregulated	A0A0B4J1V4
RPL9	0.809864	-0.304249	Downregulated	D6RAN4	GO:0044249,cellular biosynthetic process|GO:0034641,cellular nitrogen compound metabolic process|GO:0006807,nitrogen compound metabolic process|GO:0034645,cellular macromolecule biosynthetic process|GO:1901576,organic substance biosynthetic process|GO:0044267,cellular protein metabolic process|GO:0044260,cellular macromolecule metabolic process|GO:0043043,peptide biosynthetic process|GO:0071704,o…	GO:0031974,membrane-enclosed lumen|GO:0043229,intracellular organelle|GO:0043228,non-membrane-bounded organelle|GO:0043227,membrane-bounded organelle|GO:0043226,organelle|GO:0005737,cytoplasm|GO:0031981,nuclear lumen|GO:0005730,nucleolus|GO:0005634,nucleus|GO:0030529,ribonucleoprotein complex|GO:0005840,ribosome|GO:0032991,macromolecular complex|GO:0043231,intracellular membrane-bounded organelle…	GO:0097159,organic cyclic compound binding|GO:0019843,rRNA binding|GO:0003735,structural constituent of ribosome|GO:0003723,RNA binding|GO:0003676,nucleic acid binding|GO:0005198,structural molecule activity|GO:1901363,heterocyclic compound binding|GO:0005488,binding
MAP2K1	0.805517	-0.312013	Downregulated	Q02750	GO:0051049,regulation of transport|GO:0098779,activation of mitophagy in response to mitochondrial depolarization|GO:0051656,establishment of organelle localization|GO:0051650,establishment of vesicle localization|GO:0051716,cellular response to stimulus|GO:0000165,MAPK cascade|GO:0030855,epithelial cell differentiation|GO:0060541,respiratory system development|GO:0031103,axon regeneration|GO:003…	GO:0042995,cell projection|GO:0016020,membrane|GO:0005783,endoplasmic reticulum|GO:0044421,extracellular region part|GO:0030425,dendrite|GO:0030424,axon|GO:0043229,intracellular organelle|GO:0043228,non-membrane-bounded organelle|GO:0005924,cell-substrate adherens junction|GO:0005815,microtubule organizing center|GO:0005874,microtubule|GO:0043226,organelle|GO:0030054,cell junction|GO:0030055,cell…	GO:0005488,binding|GO:0008022,protein C-terminus binding|GO:0016791,phosphatase activity|GO:0019207,kinase regulator activity|GO:0035639,purine ribonucleoside triphosphate binding|GO:0019209,kinase activator activity|GO:0019899,enzyme binding|GO:0042578,phosphoric ester hydrolase activity|GO:0060089,molecular transducer activity|GO:0051020,GTPase binding|GO:0019900,kinase binding|GO:0008047,enzym…	hsa04550,Signaling pathways regulating pluripotency of stem cells|hsa05219,Bladder cancer|hsa04068,FoxO signaling pathway|hsa04022,cGMP-PKG signaling pathway|hsa04650,Natural killer cell mediated cytotoxicity|hsa05210,Colorectal cancer|hsa04726,Serotonergic synapse|hsa05216,Thyroid cancer|hsa05218,Melanoma|hsa04024,cAMP signaling pathway|hsa05215,Prostate cancer|hsa04720,Long-term potentiation|hs…		D09666,Selumetinib (USAN/INN)|D10024,Selumetinib sulfate (JAN/USAN)|D10175,Trametinib (USAN)|D10176,Trametinib dimethyl sulfoxide (JAN/USAN); Mekinist (TN)|D10426,Pimasertib (USAN/INN)|D10486,Pimasertib hydrochloride (USAN)|D10604,Binimetinib (JAN/USAN)
APOA4	0.803814	-0.315066	Downregulated	P06727	GO:0034441,plasma lipoprotein particle oxidation|GO:0034443,negative regulation of lipoprotein oxidation|GO:0034442,regulation of lipoprotein oxidation|GO:0034445,negative regulation of plasma lipoprotein particle oxidation|GO:0034444,regulation of plasma lipoprotein particle oxidation|GO:0019222,regulation of metabolic process|GO:0060193,positive regulation of lipase activity|GO:0051049,regulati…	GO:0005783,endoplasmic reticulum|GO:0044421,extracellular region part|GO:0031974,membrane-enclosed lumen|GO:0043229,intracellular organelle|GO:1990777,lipoprotein particle|GO:0005622,intracellular|GO:0043227,membrane-bounded organelle|GO:0043226,organelle|GO:0034358,plasma lipoprotein particle|GO:0005737,cytoplasm|GO:0042627,chylomicron|GO:0070062,extracellular exosome|GO:0005615,extracellular sp…	GO:0017127,cholesterol transporter activity|GO:0008047,enzyme activator activity|GO:0098772,molecular function regulator|GO:0060228,phosphatidylcholine-sterol O-acyltransferase activator activity|GO:0043168,anion binding|GO:0043169,cation binding|GO:0046914,transition metal ion binding|GO:0005543,phospholipid binding|GO:0043167,ion binding|GO:0046872,metal ion binding|GO:0030234,enzyme regulator …
APOBR	0.803447	-0.315725	Downregulated	Q0VD83	GO:0008202,steroid metabolic process|GO:0006869,lipid transport|GO:0006639,acylglycerol metabolic process|GO:0006638,neutral lipid metabolic process|GO:0044281,small molecule metabolic process|GO:0046486,glycerolipid metabolic process|GO:0044699,single-organism process|GO:0044710,single-organism metabolic process|GO:0071704,organic substance metabolic process|GO:1901360,organic cyclic compound me…	GO:0034361,very-low-density lipoprotein particle|GO:0034362,low-density lipoprotein particle|GO:0042627,chylomicron|GO:0032991,macromolecular complex|GO:0034358,plasma lipoprotein particle|GO:0032994,protein-lipid complex|GO:0016020,membrane|GO:0044464,cell part|GO:0005623,cell|GO:0034385,triglyceride-rich lipoprotein particle|GO:0071944,cell periphery|GO:1990777,lipoprotein particle|GO:0005886,p…	GO:0038024,cargo receptor activity|GO:0030229,very-low-density lipoprotein particle receptor activity|GO:0030228,lipoprotein particle receptor activity|GO:0060089,molecular transducer activity|GO:0004872,receptor activity
IKBKAP	0.801481	-0.319259	Downregulated	F5H2T0		GO:0005737,cytoplasm|GO:0044464,cell part|GO:0005623,cell|GO:0005622,intracellular|GO:0044424,intracellular part
RPS20	0.799098	-0.323555	Downregulated	G3XAN0	GO:0044249,cellular biosynthetic process|GO:0034641,cellular nitrogen compound metabolic process|GO:0006807,nitrogen compound metabolic process|GO:0034645,cellular macromolecule biosynthetic process|GO:1901576,organic substance biosynthetic process|GO:0044267,cellular protein metabolic process|GO:0044260,cellular macromolecule metabolic process|GO:0043043,peptide biosynthetic process|GO:0071704,o…	GO:0005737,cytoplasm|GO:0005622,intracellular|GO:0032991,macromolecular complex|GO:0005840,ribosome|GO:0043232,intracellular non-membrane-bounded organelle|GO:0044464,cell part|GO:0044444,cytoplasmic part|GO:0005623,cell|GO:0044391,ribosomal subunit|GO:0044446,intracellular organelle part|GO:0043229,intracellular organelle|GO:0043228,non-membrane-bounded organelle|GO:0044424,intracellular part|GO…	GO:0003735,structural constituent of ribosome|GO:0005198,structural molecule activity
CLU	0.797691	-0.326099	Downregulated	P10909	GO:0007599,hemostasis|GO:0007596,blood coagulation|GO:0019220,regulation of phosphate metabolic process|GO:0051716,cellular response to stimulus|GO:0019222,regulation of metabolic process|GO:0043207,response to external biotic stimulus|GO:0060548,negative regulation of cell death|GO:0045859,regulation of protein kinase activity|GO:0008366,axon ensheathment|GO:0046483,heterocycle metabolic process…	GO:0005783,endoplasmic reticulum|GO:0016234,inclusion body|GO:0031974,membrane-enclosed lumen|GO:0031012,extracellular matrix|GO:0043229,intracellular organelle|GO:1990777,lipoprotein particle|GO:0072562,blood microparticle|GO:0060205,cytoplasmic membrane-bounded vesicle lumen|GO:0005622,intracellular|GO:0043227,membrane-bounded organelle|GO:0043226,organelle|GO:0034358,plasma lipoprotein particl…	GO:0016787,hydrolase activity|GO:0016818,hydrolase activity, acting on acid anhydrides, in phosphorus-containing anhydrides|GO:0031625,ubiquitin protein ligase binding|GO:0044389,ubiquitin-like protein ligase binding|GO:0005515,protein binding|GO:0003824,catalytic activity|GO:0051087,chaperone binding|GO:0017111,nucleoside-triphosphatase activity|GO:0019899,enzyme binding|GO:0016817,hydrolase act…	hsa04610,Complement and coagulation cascades		D09403,Custirsen sodium (USAN)
RPS17	0.796297	-0.328622	Downregulated	P08708	GO:0008104,protein localization|GO:0061024,membrane organization|GO:1901362,organic cyclic compound biosynthetic process|GO:0071840,cellular component organization or biogenesis|GO:1901361,organic cyclic compound catabolic process|GO:0070727,cellular macromolecule localization|GO:0002262,myeloid cell homeostasis|GO:0043043,peptide biosynthetic process|GO:0044419,interspecies interaction between o…	GO:0022626,cytosolic ribosome|GO:0022627,cytosolic small ribosomal subunit|GO:0043229,intracellular organelle|GO:0043228,non-membrane-bounded organelle|GO:0005924,cell-substrate adherens junction|GO:0005925,focal adhesion|GO:0043227,membrane-bounded organelle|GO:0043226,organelle|GO:0030054,cell junction|GO:0015935,small ribosomal subunit|GO:0005737,cytoplasm|GO:0031982,vesicle|GO:0016020,membran…	GO:0097159,organic cyclic compound binding|GO:0044822,poly(A) RNA binding|GO:0005198,structural molecule activity|GO:0003735,structural constituent of ribosome|GO:0003723,RNA binding|GO:0003676,nucleic acid binding|GO:1901363,heterocyclic compound binding|GO:0005488,binding	hsa03010,Ribosome
RPS7	0.786939	-0.345677	Downregulated	P62081	GO:0008104,protein localization|GO:0061024,membrane organization|GO:1901362,organic cyclic compound biosynthetic process|GO:0071840,cellular component organization or biogenesis|GO:1901361,organic cyclic compound catabolic process|GO:0070727,cellular macromolecule localization|GO:0048869,cellular developmental process|GO:0043043,peptide biosynthetic process|GO:0044419,interspecies interaction bet…	GO:0044445,cytosolic part|GO:0032040,small-subunit processome|GO:0022626,cytosolic ribosome|GO:0022627,cytosolic small ribosomal subunit|GO:0030686,90S preribosome|GO:0031974,membrane-enclosed lumen|GO:0030684,preribosome|GO:0043229,intracellular organelle|GO:0005840,ribosome|GO:0005924,cell-substrate adherens junction|GO:0005815,microtubule organizing center|GO:0043227,membrane-bounded organelle…	GO:0005515,protein binding|GO:0097159,organic cyclic compound binding|GO:0044822,poly(A) RNA binding|GO:0005198,structural molecule activity|GO:0003735,structural constituent of ribosome|GO:0003723,RNA binding|GO:0003676,nucleic acid binding|GO:1901363,heterocyclic compound binding|GO:0005488,binding	hsa03010,Ribosome
REXO2	0.786939	-0.345677	Downregulated	H0YGR4	GO:0016070,RNA metabolic process|GO:0090503,RNA phosphodiester bond hydrolysis, exonucleolytic|GO:0090501,RNA phosphodiester bond hydrolysis|GO:0044260,cellular macromolecule metabolic process|GO:0006139,nucleobase-containing compound metabolic process|GO:0009987,cellular process|GO:0006725,cellular aromatic compound metabolic process|GO:0044237,cellular metabolic process|GO:0043170,macromolecule…		GO:0016787,hydrolase activity|GO:0008408,3'-5' exonuclease activity|GO:0016796,exonuclease activity, active with either ribo- or deoxyribonucleic acids and producing 5'-phosphomonoesters|GO:0004518,nuclease activity|GO:0097159,organic cyclic compound binding|GO:0004527,exonuclease activity|GO:0004540,ribonuclease activity|GO:0004532,exoribonuclease activity|GO:0016788,hydrolase activity, acting o…
SPARCL1	0.785683	-0.347981	Downregulated	Q14515	GO:0044700,single organism signaling|GO:0051716,cellular response to stimulus|GO:0050896,response to stimulus|GO:0009987,cellular process|GO:0044763,single-organism cellular process|GO:0050794,regulation of cellular process|GO:0065007,biological regulation|GO:0023052,signaling|GO:0007165,signal transduction|GO:0007154,cell communication|GO:0050789,regulation of biological process|GO:0044699,singl…	GO:0043230,extracellular organelle|GO:0070062,extracellular exosome|GO:0044421,extracellular region part|GO:0043227,membrane-bounded organelle|GO:0031012,extracellular matrix|GO:0043226,organelle|GO:0005576,extracellular region|GO:0005615,extracellular space|GO:0031988,membrane-bounded vesicle|GO:1903561,extracellular vesicle|GO:0065010,extracellular membrane-bounded organelle|GO:0005578,proteina…	GO:0043169,cation binding|GO:0043167,ion binding|GO:0005488,binding|GO:0046872,metal ion binding|GO:0005509,calcium ion binding
SDC1	0.784228	-0.350655	Downregulated	H7C1K4	GO:0040011,locomotion|GO:0048870,cell motility|GO:0009987,cellular process|GO:0006928,movement of cell or subcellular component|GO:0051674,localization of cell|GO:0044763,single-organism cellular process|GO:0016477,cell migration|GO:0051179,localization|GO:0044699,single-organism process	GO:0016020,membrane
GCLM	0.778779	-0.360714	Downregulated	P48507	GO:2001234,negative regulation of apoptotic signaling pathway|GO:2001236,regulation of extrinsic apoptotic signaling pathway|GO:2001237,negative regulation of extrinsic apoptotic signaling pathway|GO:0019222,regulation of metabolic process|GO:2001233,regulation of apoptotic signaling pathway|GO:0048585,negative regulation of response to stimulus|GO:0048583,regulation of response to stimulus|GO:00…	GO:0043234,protein complex|GO:0005737,cytoplasm|GO:0032991,macromolecular complex|GO:1902494,catalytic complex|GO:0017109,glutamate-cysteine ligase complex|GO:0044464,cell part|GO:0005623,cell|GO:0005622,intracellular|GO:0044444,cytoplasmic part|GO:0044424,intracellular part|GO:0005829,cytosol	GO:0046982,protein heterodimerization activity|GO:0003824,catalytic activity|GO:0035226,glutamate-cysteine ligase catalytic subunit binding|GO:0004357,glutamate-cysteine ligase activity|GO:0030234,enzyme regulator activity|GO:0019899,enzyme binding|GO:0016881,acid-amino acid ligase activity|GO:0016879,ligase activity, forming carbon-nitrogen bonds|GO:0005488,binding|GO:0005515,protein binding|GO:…	hsa01100,Metabolic pathways|hsa00270,Cysteine and methionine metabolism|hsa00480,Glutathione metabolism
SFXN3	0.774333	-0.368975	Downregulated	A0A0A0MS41	GO:0006810,transport|GO:0006811,ion transport|GO:0009987,cellular process|GO:0051179,localization|GO:0034220,ion transmembrane transport|GO:0044765,single-organism transport|GO:0044763,single-organism cellular process|GO:0044699,single-organism process|GO:0051234,establishment of localization|GO:0055085,transmembrane transport|GO:1902578,single-organism localization	GO:0031975,envelope|GO:0043229,intracellular organelle|GO:0043227,membrane-bounded organelle|GO:0043226,organelle|GO:0031224,intrinsic component of membrane|GO:0005737,cytoplasm|GO:0031090,organelle membrane|GO:0016021,integral component of membrane|GO:0016020,membrane|GO:0005740,mitochondrial envelope|GO:0005739,mitochondrion|GO:0031967,organelle envelope|GO:0031966,mitochondrial membrane|GO:004…	GO:0022891,substrate-specific transmembrane transporter activity|GO:0022892,substrate-specific transporter activity|GO:0005215,transporter activity|GO:0015075,ion transmembrane transporter activity|GO:0022857,transmembrane transporter activity
SCPEP1	0.772908	-0.371631	Downregulated	Q9HB40	GO:0008152,metabolic process|GO:0045909,positive regulation of vasodilation|GO:0019752,carboxylic acid metabolic process|GO:0003013,circulatory system process|GO:0008217,regulation of blood pressure|GO:0044281,small molecule metabolic process|GO:0003018,vascular process in circulatory system|GO:0042311,vasodilation|GO:0042312,regulation of vasodilation|GO:0042573,retinoic acid metabolic process|G…	GO:0005737,cytoplasm|GO:0005622,intracellular|GO:0043230,extracellular organelle|GO:0031982,vesicle|GO:0044421,extracellular region part|GO:0043227,membrane-bounded organelle|GO:0005829,cytosol|GO:0044464,cell part|GO:0005623,cell|GO:0031988,membrane-bounded vesicle|GO:0044444,cytoplasmic part|GO:0005576,extracellular region|GO:0044424,intracellular part|GO:1903561,extracellular vesicle|GO:006501…	GO:0016787,hydrolase activity|GO:0017171,serine hydrolase activity|GO:0003824,catalytic activity|GO:0004180,carboxypeptidase activity|GO:0004185,serine-type carboxypeptidase activity|GO:0008238,exopeptidase activity|GO:0070011,peptidase activity, acting on L-amino acid peptides|GO:0070008,serine-type exopeptidase activity|GO:0008233,peptidase activity|GO:0008236,serine-type peptidase activity
SERPIND1	0.772376	-0.372625	Downregulated	P05546	GO:0009892,negative regulation of metabolic process|GO:0080090,regulation of primary metabolic process|GO:0019222,regulation of metabolic process|GO:0031324,negative regulation of cellular metabolic process|GO:0031323,regulation of cellular metabolic process|GO:0032501,multicellular organismal process|GO:0007599,hemostasis|GO:0043086,negative regulation of catalytic activity|GO:0044699,single-org…	GO:0043230,extracellular organelle|GO:0031982,vesicle|GO:0044421,extracellular region part|GO:0043227,membrane-bounded organelle|GO:0031988,membrane-bounded vesicle|GO:0005576,extracellular region|GO:0005615,extracellular space|GO:1903561,extracellular vesicle|GO:0065010,extracellular membrane-bounded organelle|GO:0043226,organelle|GO:0070062,extracellular exosome	GO:1901681,sulfur compound binding|GO:0043168,anion binding|GO:0004866,endopeptidase inhibitor activity|GO:0097367,carbohydrate derivative binding|GO:0061135,endopeptidase regulator activity|GO:0061134,peptidase regulator activity|GO:0008201,heparin binding|GO:0005539,glycosaminoglycan binding|GO:0043167,ion binding|GO:0005488,binding|GO:0030414,peptidase inhibitor activity|GO:0004867,serine-type…	hsa04610,Complement and coagulation cascades
DPYD	0.772295	-0.372777	Downregulated	Q12882	GO:0008152,metabolic process|GO:0044237,cellular metabolic process|GO:0019752,carboxylic acid metabolic process|GO:0006210,thymine catabolic process|GO:0044248,cellular catabolic process|GO:0072529,pyrimidine-containing compound catabolic process|GO:0009164,nucleoside catabolic process|GO:0006807,nitrogen compound metabolic process|GO:1901360,organic cyclic compound metabolic process|GO:0044281,s…	GO:0005737,cytoplasm|GO:0005829,cytosol|GO:0044464,cell part|GO:0005623,cell|GO:0005622,intracellular|GO:0044444,cytoplasmic part|GO:0044424,intracellular part	GO:0005488,binding|GO:0000166,nucleotide binding|GO:1901363,heterocyclic compound binding|GO:1901265,nucleoside phosphate binding|GO:0016491,oxidoreductase activity|GO:0043168,anion binding|GO:0043169,cation binding|GO:0050661,NADP binding|GO:0050660,flavin adenine dinucleotide binding|GO:0016628,oxidoreductase activity, acting on the CH-CH group of donors, NAD or NADP as acceptor|GO:0016627,oxid…	hsa00983,Drug metabolism - other enzymes|hsa01100,Metabolic pathways|hsa00770,Pantothenate and CoA biosynthesis|hsa00240,Pyrimidine metabolism|hsa00410,beta-Alanine metabolism		D01846,Gimeracil (JAN/INN)|D03998,Eniluracil (USAN/INN)
RCN1	0.76374	-0.388847	Downregulated	Q15293	GO:0032502,developmental process|GO:0048513,organ development|GO:0001701,in utero embryonic development|GO:0044707,single-multicellular organism process|GO:0007423,sensory organ development|GO:0032501,multicellular organismal process|GO:0048856,anatomical structure development|GO:0044767,single-organism developmental process|GO:0009790,embryo development|GO:0009792,embryo development ending in bi…	GO:0005737,cytoplasm|GO:0012505,endomembrane system|GO:0005783,endoplasmic reticulum|GO:0044432,endoplasmic reticulum part|GO:0043233,organelle lumen|GO:0044464,cell part|GO:0044444,cytoplasmic part|GO:0031974,membrane-enclosed lumen|GO:0005622,intracellular|GO:0044446,intracellular organelle part|GO:0070013,intracellular organelle lumen|GO:0043229,intracellular organelle|GO:0005788,endoplasmic r…	GO:0043169,cation binding|GO:0043167,ion binding|GO:0005488,binding|GO:0005515,protein binding|GO:0046872,metal ion binding|GO:0005509,calcium ion binding
CLIP1	0.763736	-0.388853	Downregulated	J3KP58		GO:0005856,cytoskeleton|GO:0043234,protein complex|GO:0015630,microtubule cytoskeleton|GO:0043228,non-membrane-bounded organelle|GO:0005622,intracellular|GO:0043232,intracellular non-membrane-bounded organelle|GO:0035371,microtubule plus-end|GO:0044464,cell part|GO:0005623,cell|GO:0005737,cytoplasm|GO:0044446,intracellular organelle part|GO:0043229,intracellular organelle|GO:0044430,cytoskeletal …	GO:0043169,cation binding|GO:0046914,transition metal ion binding|GO:0097159,organic cyclic compound binding|GO:0043167,ion binding|GO:0008270,zinc ion binding|GO:0003676,nucleic acid binding|GO:0046872,metal ion binding|GO:1901363,heterocyclic compound binding|GO:0005488,binding
AMBP	0.760883	-0.394254	Downregulated	P02760	GO:0019220,regulation of phosphate metabolic process|GO:0080090,regulation of primary metabolic process|GO:0019222,regulation of metabolic process|GO:0048585,negative regulation of response to stimulus|GO:0048583,regulation of response to stimulus|GO:0006778,porphyrin-containing compound metabolic process|GO:0007165,signal transduction|GO:0023014,signal transduction by protein phosphorylation|GO:…	GO:0043229,intracellular organelle|GO:0071944,cell periphery|GO:0043227,membrane-bounded organelle|GO:0043226,organelle|GO:0031982,vesicle|GO:0016020,membrane|GO:0072562,blood microparticle|GO:0031988,membrane-bounded vesicle|GO:0009986,cell surface|GO:0005886,plasma membrane|GO:1903561,extracellular vesicle|GO:0005615,extracellular space|GO:0043230,extracellular organelle|GO:0043231,intracellula…	GO:0004866,endopeptidase inhibitor activity|GO:0044877,macromolecular complex binding|GO:0005488,binding|GO:0004857,enzyme inhibitor activity|GO:0098772,molecular function regulator|GO:1901363,heterocyclic compound binding|GO:0019855,calcium channel inhibitor activity|GO:0016248,channel inhibitor activity|GO:0032403,protein complex binding|GO:0030234,enzyme regulator activity|GO:0042802,identical…
CMPK1	0.759104	-0.397631	Downregulated	P30085	GO:0044710,single-organism metabolic process|GO:0009259,ribonucleotide metabolic process|GO:0008152,metabolic process|GO:0009218,pyrimidine ribonucleotide metabolic process|GO:0009141,nucleoside triphosphate metabolic process|GO:0009142,nucleoside triphosphate biosynthetic process|GO:1901564,organonitrogen compound metabolic process|GO:0072528,pyrimidine-containing compound biosynthetic process|G…	GO:0031974,membrane-enclosed lumen|GO:0043229,intracellular organelle|GO:0043228,non-membrane-bounded organelle|GO:0043227,membrane-bounded organelle|GO:0043226,organelle|GO:0005737,cytoplasm|GO:0070062,extracellular exosome|GO:0031981,nuclear lumen|GO:0005730,nucleolus|GO:0005634,nucleus|GO:0031988,membrane-bounded vesicle|GO:0005654,nucleoplasm|GO:1903561,extracellular vesicle|GO:0031982,vesicl…	GO:0019201,nucleotide kinase activity|GO:0019206,nucleoside kinase activity|GO:0019205,nucleobase-containing compound kinase activity|GO:0035639,purine ribonucleoside triphosphate binding|GO:0005488,binding|GO:0009041,uridylate kinase activity|GO:0043167,ion binding|GO:1901363,heterocyclic compound binding|GO:0001883,purine nucleoside binding|GO:0001882,nucleoside binding|GO:0043168,anion binding…	hsa01100,Metabolic pathways|hsa00240,Pyrimidine metabolism
CALD1	0.756895	-0.401834	Downregulated	Q05682	GO:0032501,multicellular organismal process|GO:0006936,muscle contraction|GO:0044707,single-multicellular organism process|GO:0009987,cellular process|GO:0006928,movement of cell or subcellular component|GO:0003012,muscle system process|GO:0044763,single-organism cellular process|GO:0044699,single-organism process|GO:0003008,system process	GO:0015629,actin cytoskeleton|GO:0030016,myofibril|GO:0043229,intracellular organelle|GO:0043228,non-membrane-bounded organelle|GO:0005622,intracellular|GO:0043226,organelle|GO:0005856,cytoskeleton|GO:0016020,membrane|GO:0044430,cytoskeletal part|GO:0005737,cytoplasm|GO:0030478,actin cap|GO:0044424,intracellular part|GO:0005938,cell cortex|GO:0005886,plasma membrane|GO:0043232,intracellular non-m…	GO:0008092,cytoskeletal protein binding|GO:0017022,myosin binding|GO:0003779,actin binding|GO:0005516,calmodulin binding|GO:0005515,protein binding|GO:0005523,tropomyosin binding|GO:0005488,binding	hsa04270,Vascular smooth muscle contraction
GCA	0.746837	-0.421134	Downregulated	H7BXD5	GO:0044238,primary metabolic process|GO:0019538,protein metabolic process|GO:0043170,macromolecule metabolic process|GO:0071704,organic substance metabolic process|GO:0008152,metabolic process|GO:0006508,proteolysis	GO:0005737,cytoplasm|GO:0044464,cell part|GO:0005623,cell|GO:0005622,intracellular|GO:0044424,intracellular part	GO:0016787,hydrolase activity|GO:0004175,endopeptidase activity|GO:0043169,cation binding|GO:0043167,ion binding|GO:0070011,peptidase activity, acting on L-amino acid peptides|GO:0003824,catalytic activity|GO:0004197,cysteine-type endopeptidase activity|GO:0005509,calcium ion binding|GO:0008233,peptidase activity|GO:0046872,metal ion binding|GO:0004198,calcium-dependent cysteine-type endopeptidas…
ARHGDIB	0.742807	-0.428941	Downregulated	P52566	GO:0019222,regulation of metabolic process|GO:2000242,negative regulation of reproductive process|GO:2000241,regulation of reproductive process|GO:0048583,regulation of response to stimulus|GO:0007162,negative regulation of cell adhesion|GO:0007165,signal transduction|GO:0071840,cellular component organization or biogenesis|GO:0051716,cellular response to stimulus|GO:0009966,regulation of signal …	GO:0043229,intracellular organelle|GO:0043228,non-membrane-bounded organelle|GO:0043227,membrane-bounded organelle|GO:0043226,organelle|GO:0005856,cytoskeleton|GO:0070062,extracellular exosome|GO:0016023,cytoplasmic membrane-bounded vesicle|GO:0031410,cytoplasmic vesicle|GO:0016020,membrane|GO:0031988,membrane-bounded vesicle|GO:0005737,cytoplasm|GO:1903561,extracellular vesicle|GO:0031982,vesicl…	GO:0016787,hydrolase activity|GO:0016818,hydrolase activity, acting on acid anhydrides, in phosphorus-containing anhydrides|GO:0016462,pyrophosphatase activity|GO:0005092,GDP-dissociation inhibitor activity|GO:0003924,GTPase activity|GO:0030234,enzyme regulator activity|GO:0005096,GTPase activator activity|GO:0017111,nucleoside-triphosphatase activity|GO:0005094,Rho GDP-dissociation inhibitor act…	hsa04962,Vasopressin-regulated water reabsorption|hsa04722,Neurotrophin signaling pathway
AQP4	0.741618	-0.431252	Downregulated	V9PBN7	GO:0009992,cellular water homeostasis|GO:0015850,organic hydroxy compound transport|GO:0042592,homeostatic process|GO:0051179,localization|GO:0090066,regulation of anatomical structure size|GO:0044699,single-organism process|GO:0006884,cell volume homeostasis|GO:0071840,cellular component organization or biogenesis|GO:0016043,cellular component organization|GO:0008643,carbohydrate transport|GO:00…	GO:0098590,plasma membrane region|GO:0016020,membrane|GO:0031226,intrinsic component of plasma membrane|GO:0016021,integral component of membrane|GO:0098589,membrane region|GO:0044464,cell part|GO:0005623,cell|GO:0016323,basolateral plasma membrane|GO:0071944,cell periphery|GO:0005887,integral component of plasma membrane|GO:0005886,plasma membrane|GO:0044425,membrane part|GO:0044459,plasma membr…	GO:0022891,substrate-specific transmembrane transporter activity|GO:0022838,substrate-specific channel activity|GO:0022857,transmembrane transporter activity|GO:1901476,carbohydrate transporter activity|GO:0005215,transporter activity|GO:0015665,alcohol transmembrane transporter activity|GO:0015144,carbohydrate transmembrane transporter activity|GO:0015250,water channel activity|GO:1901618,organi…
RPL22	0.741103	-0.432254	Downregulated	P35268	GO:0008104,protein localization|GO:0046632,alpha-beta T cell differentiation|GO:0046631,alpha-beta T cell activation|GO:0061024,membrane organization|GO:1901362,organic cyclic compound biosynthetic process|GO:0071840,cellular component organization or biogenesis|GO:1901361,organic cyclic compound catabolic process|GO:0070727,cellular macromolecule localization|GO:0048869,cellular developmental pr…	GO:0015934,large ribosomal subunit|GO:0022625,cytosolic large ribosomal subunit|GO:0043229,intracellular organelle|GO:0043228,non-membrane-bounded organelle|GO:0022626,cytosolic ribosome|GO:0005924,cell-substrate adherens junction|GO:0005925,focal adhesion|GO:0043227,membrane-bounded organelle|GO:0043226,organelle|GO:0030054,cell junction|GO:0030055,cell-substrate junction|GO:0005737,cytoplasm|GO…	GO:1901681,sulfur compound binding|GO:0043168,anion binding|GO:0005515,protein binding|GO:0008201,heparin binding|GO:0097367,carbohydrate derivative binding|GO:0097159,organic cyclic compound binding|GO:0044822,poly(A) RNA binding|GO:0005539,glycosaminoglycan binding|GO:0005198,structural molecule activity|GO:0003735,structural constituent of ribosome|GO:0003723,RNA binding|GO:0003676,nucleic aci…	hsa03010,Ribosome
HIST1H1E	0.736651	-0.440947	Downregulated	P10412	GO:0080090,regulation of primary metabolic process|GO:0019222,regulation of metabolic process|GO:1901362,organic cyclic compound biosynthetic process|GO:0071840,cellular component organization or biogenesis|GO:0010605,negative regulation of macromolecule metabolic process|GO:0048519,negative regulation of biological process|GO:0060255,regulation of macromolecule metabolic process|GO:0065004,prote…	GO:0031974,membrane-enclosed lumen|GO:0044815,DNA packaging complex|GO:0043229,intracellular organelle|GO:0043228,non-membrane-bounded organelle|GO:0000785,chromatin|GO:0000786,nucleosome|GO:0000228,nuclear chromosome|GO:0043227,membrane-bounded organelle|GO:0043226,organelle|GO:0070062,extracellular exosome|GO:0031981,nuclear lumen|GO:0005634,nucleus|GO:0031988,membrane-bounded vesicle|GO:004445…	GO:0043566,structure-specific DNA binding|GO:0005515,protein binding|GO:0097159,organic cyclic compound binding|GO:0044822,poly(A) RNA binding|GO:0031490,chromatin DNA binding|GO:0044877,macromolecular complex binding|GO:0003723,RNA binding|GO:0003676,nucleic acid binding|GO:0003677,DNA binding|GO:0003682,chromatin binding|GO:1901363,heterocyclic compound binding|GO:0005488,binding
KIT	0.732253	-0.449587	Downregulated	P10721	GO:0048066,developmental pigmentation|GO:0048103,somatic stem cell division|GO:0001501,skeletal system development|GO:0051716,cellular response to stimulus|GO:0000003,reproduction|GO:0000165,MAPK cascade|GO:0045137,development of primary sexual characteristics|GO:0030855,epithelial cell differentiation|GO:0030595,leukocyte chemotaxis|GO:0048468,cell development|GO:0050931,pigment cell differentia…	GO:0009897,external side of plasma membrane|GO:0000323,lytic vacuole|GO:0009898,cytoplasmic side of plasma membrane|GO:0097223,sperm part|GO:0043229,intracellular organelle|GO:0071944,cell periphery|GO:0001669,acrosomal vesicle|GO:0098552,side of membrane|GO:0043227,membrane-bounded organelle|GO:0043226,organelle|GO:0030054,cell junction|GO:0005737,cytoplasm|GO:0031982,vesicle|GO:0016023,cytoplas…	GO:0038023,signaling receptor activity|GO:0035639,purine ribonucleoside triphosphate binding|GO:0019955,cytokine binding|GO:0019899,enzyme binding|GO:0060089,molecular transducer activity|GO:0004872,receptor activity|GO:0004871,signal transducer activity|GO:0043167,ion binding|GO:1901363,heterocyclic compound binding|GO:0001883,purine nucleoside binding|GO:0001882,nucleoside binding|GO:0043168,an…	hsa05221,Acute myeloid leukemia|hsa05200,Pathways in cancer|hsa04072,Phospholipase D signaling pathway|hsa04015,Rap1 signaling pathway|hsa04014,Ras signaling pathway|hsa04916,Melanogenesis|hsa04144,Endocytosis|hsa04640,Hematopoietic cell lineage|hsa05230,Central carbon metabolism in cancer|hsa04060,Cytokine-cytokine receptor interaction|hsa04151,PI3K-Akt signaling pathway	H00003,Acute myeloid leukemia (AML)|H00023,Testicular cancer	D01441,Imatinib mesilate (JAN); Imatinib mesylate (USAN); Gleevec (TN); Glivec (TN)|D03218,Axitinib (JAN/USAN); Inlyta (TN)|D03658,Dasatinib (INN)|D05029,Midostaurin (USAN/INN)|D05380,Pazopanib hydrochloride (JAN/USAN); Votrient (TN)|D05819,Semaxanib (USAN/INN)|D06005,Tandutinib (USAN/INN)|D06272,Sorafenib tosilate (JAN); Sorafenib tosylate (USAN); Nexavar (TN)|D06285,Vatalanib (USAN/INN)|D06402,…
TRPV2	0.727795	-0.458395	Downregulated	Q9Y5S1	GO:0048675,axon extension|GO:0048589,developmental growth|GO:0048588,developmental cell growth|GO:0051049,regulation of transport|GO:0048468,cell development|GO:0034764,positive regulation of transmembrane transport|GO:0034765,regulation of ion transmembrane transport|GO:0034767,positive regulation of ion transmembrane transport|GO:0031344,regulation of cell projection organization|GO:0034762,reg…	GO:0048770,pigment granule|GO:0030426,growth cone|GO:0030424,axon|GO:0043229,intracellular organelle|GO:0071944,cell periphery|GO:0031226,intrinsic component of plasma membrane|GO:0043226,organelle|GO:0031224,intrinsic component of membrane|GO:0005737,cytoplasm|GO:0031982,vesicle|GO:0016023,cytoplasmic membrane-bounded vesicle|GO:0031410,cytoplasmic vesicle|GO:0016021,integral component of membra…	GO:0022891,substrate-specific transmembrane transporter activity|GO:0015085,calcium ion transmembrane transporter activity|GO:0022838,substrate-specific channel activity|GO:0005261,cation channel activity|GO:0005262,calcium channel activity|GO:0005215,transporter activity|GO:0005216,ion channel activity|GO:0008324,cation transmembrane transporter activity|GO:0072509,divalent inorganic cation tran…	hsa04750,Inflammatory mediator regulation of TRP channels
RPS23	0.727708	-0.458568	Downregulated	P62266	GO:0008104,protein localization|GO:0061024,membrane organization|GO:1901362,organic cyclic compound biosynthetic process|GO:1901360,organic cyclic compound metabolic process|GO:1901361,organic cyclic compound catabolic process|GO:0070727,cellular macromolecule localization|GO:0043043,peptide biosynthetic process|GO:0044419,interspecies interaction between organisms|GO:0019058,viral life cycle|GO:…	GO:0022626,cytosolic ribosome|GO:0022627,cytosolic small ribosomal subunit|GO:0031974,membrane-enclosed lumen|GO:0043229,intracellular organelle|GO:0043228,non-membrane-bounded organelle|GO:0043227,membrane-bounded organelle|GO:0043226,organelle|GO:0015935,small ribosomal subunit|GO:0005737,cytoplasm|GO:0031981,nuclear lumen|GO:0005730,nucleolus|GO:0005634,nucleus|GO:0016020,membrane|GO:0030529,r…	GO:0005515,protein binding|GO:0097159,organic cyclic compound binding|GO:0044822,poly(A) RNA binding|GO:0005198,structural molecule activity|GO:0003735,structural constituent of ribosome|GO:0003723,RNA binding|GO:0003676,nucleic acid binding|GO:1901363,heterocyclic compound binding|GO:0005488,binding	hsa03010,Ribosome
C1QC	0.721227	-0.471474	Downregulated	P02747	GO:0008152,metabolic process|GO:0071704,organic substance metabolic process|GO:0030225,macrophage differentiation|GO:0048584,positive regulation of response to stimulus|GO:0048583,regulation of response to stimulus|GO:0065007,biological regulation|GO:0002455,humoral immune response mediated by circulating immunoglobulin|GO:0006955,immune response|GO:0050789,regulation of biological process|GO:004…	GO:0043234,protein complex|GO:0043230,extracellular organelle|GO:0031982,vesicle|GO:0044421,extracellular region part|GO:0043227,membrane-bounded organelle|GO:0072562,blood microparticle|GO:0031988,membrane-bounded vesicle|GO:0005576,extracellular region|GO:0005615,extracellular space|GO:0005581,collagen trimer|GO:0032991,macromolecular complex|GO:1903561,extracellular vesicle|GO:0065010,extracel…		hsa05133,Pertussis|hsa04610,Complement and coagulation cascades|hsa05322,Systemic lupus erythematosus|hsa05142,Chagas disease (American trypanosomiasis)|hsa05150,Staphylococcus aureus infection|hsa05020,Prion diseases
RPL35A	0.720018	-0.473895	Downregulated	F8WBS5	GO:0044249,cellular biosynthetic process|GO:0034641,cellular nitrogen compound metabolic process|GO:0006807,nitrogen compound metabolic process|GO:0034645,cellular macromolecule biosynthetic process|GO:1901576,organic substance biosynthetic process|GO:0044267,cellular protein metabolic process|GO:0044260,cellular macromolecule metabolic process|GO:0043043,peptide biosynthetic process|GO:0071704,o…	GO:0005737,cytoplasm|GO:0032991,macromolecular complex|GO:0005840,ribosome|GO:0043232,intracellular non-membrane-bounded organelle|GO:0044464,cell part|GO:0044444,cytoplasmic part|GO:0005623,cell|GO:0030529,ribonucleoprotein complex|GO:0043229,intracellular organelle|GO:0043228,non-membrane-bounded organelle|GO:0044424,intracellular part|GO:0005622,intracellular|GO:0043226,organelle	GO:0003735,structural constituent of ribosome|GO:0005198,structural molecule activity
TBCE	0.701422	-0.511646	Downregulated	Q15813	GO:0032502,developmental process|GO:0044707,single-multicellular organism process|GO:0006457,protein folding|GO:0008152,metabolic process|GO:0048589,developmental growth|GO:0048667,cell morphogenesis involved in neuron differentiation|GO:0030030,cell projection organization|GO:0030154,cell differentiation|GO:0048468,cell development|GO:0007610,behavior|GO:0009791,post-embryonic development|GO:000…	GO:0005856,cytoskeleton|GO:0043234,protein complex|GO:0015630,microtubule cytoskeleton|GO:0043228,non-membrane-bounded organelle|GO:0043232,intracellular non-membrane-bounded organelle|GO:0044464,cell part|GO:0005623,cell|GO:0005737,cytoplasm|GO:0044446,intracellular organelle part|GO:0043229,intracellular organelle|GO:0044430,cytoskeletal part|GO:0044424,intracellular part|GO:0032991,macromolecu…	GO:0051087,chaperone binding|GO:0005488,binding|GO:0005515,protein binding
RBMS1	0.693948	-0.5271	Downregulated	F6Y5H0			GO:0097159,organic cyclic compound binding|GO:0000166,nucleotide binding|GO:0036094,small molecule binding|GO:0003723,RNA binding|GO:0003676,nucleic acid binding|GO:1901363,heterocyclic compound binding|GO:1901265,nucleoside phosphate binding|GO:0005488,binding
LYVE1	0.685951	-0.543822	Downregulated	Q9Y5Y7	GO:0030203,glycosaminoglycan metabolic process|GO:0050896,response to stimulus|GO:0030212,hyaluronan metabolic process|GO:0006928,movement of cell or subcellular component|GO:0007160,cell-matrix adhesion|GO:0006807,nitrogen compound metabolic process|GO:0023052,signaling|GO:0007165,signal transduction|GO:0009653,anatomical structure morphogenesis|GO:0050789,regulation of biological process|GO:004…	GO:0071944,cell periphery|GO:0031226,intrinsic component of plasma membrane|GO:0043226,organelle|GO:0031224,intrinsic component of membrane|GO:0031982,vesicle|GO:0043227,membrane-bounded organelle|GO:0016021,integral component of membrane|GO:0016020,membrane|GO:0031988,membrane-bounded vesicle|GO:0044459,plasma membrane part|GO:0005887,integral component of plasma membrane|GO:0005886,plasma membr…	GO:0038023,signaling receptor activity|GO:0005515,protein binding|GO:0005540,hyaluronic acid binding|GO:0097367,carbohydrate derivative binding|GO:0005539,glycosaminoglycan binding|GO:0060089,molecular transducer activity|GO:0004888,transmembrane signaling receptor activity|GO:0004872,receptor activity|GO:0004871,signal transducer activity|GO:0005488,binding
HLA-A	0.683069	-0.549898	Downregulated	P30447	GO:0002449,lymphocyte mediated immunity|GO:0071346,cellular response to interferon-gamma|GO:0019221,cytokine-mediated signaling pathway|GO:0044699,single-organism process|GO:0048585,negative regulation of response to stimulus|GO:0006955,immune response|GO:0048583,regulation of response to stimulus|GO:0002478,antigen processing and presentation of exogenous peptide antigen|GO:0002707,negative regu…	GO:0005783,endoplasmic reticulum|GO:0098576,lumenal side of membrane|GO:0005886,plasma membrane|GO:0005789,endoplasmic reticulum membrane|GO:0030139,endocytic vesicle|GO:0042175,nuclear outer membrane-endoplasmic reticulum membrane network|GO:0043229,intracellular organelle|GO:0030176,integral component of endoplasmic reticulum membrane|GO:0031301,integral component of organelle membrane|GO:00313…	GO:0042277,peptide binding|GO:0003823,antigen binding|GO:0042605,peptide antigen binding|GO:0033218,amide binding|GO:0005488,binding|GO:0005515,protein binding|GO:0030881,beta-2-microglobulin binding
KIF13B	0.680478	-0.55538	Downregulated	Q9NQT8	GO:0008104,protein localization|GO:0048468,cell development|GO:0007165,signal transduction|GO:0031344,regulation of cell projection organization|GO:0071840,cellular component organization or biogenesis|GO:0051716,cellular response to stimulus|GO:0070727,cellular macromolecule localization|GO:0048869,cellular developmental process|GO:0045664,regulation of neuron differentiation|GO:0033036,macromol…	GO:0030424,axon|GO:0043229,intracellular organelle|GO:0043228,non-membrane-bounded organelle|GO:0005871,kinesin complex|GO:0005874,microtubule|GO:0043226,organelle|GO:0005856,cytoskeleton|GO:0005875,microtubule associated complex|GO:0097458,neuron part|GO:0044430,cytoskeletal part|GO:0043005,neuron projection|GO:0005737,cytoplasm|GO:0015630,microtubule cytoskeleton|GO:0042995,cell projection|GO:0…	GO:0035639,purine ribonucleoside triphosphate binding|GO:0019899,enzyme binding|GO:0044877,macromolecular complex binding|GO:0005488,binding|GO:0016887,ATPase activity|GO:0043167,ion binding|GO:1901363,heterocyclic compound binding|GO:0001883,purine nucleoside binding|GO:0001882,nucleoside binding|GO:0043168,anion binding|GO:0019900,kinase binding|GO:0000166,nucleotide binding|GO:0071889,14-3-3 p…
LDB3	0.680276	-0.555808	Downregulated	O75112	GO:0022607,cellular component assembly|GO:0031032,actomyosin structure organization|GO:0030154,cell differentiation|GO:0048468,cell development|GO:0030036,actin cytoskeleton organization|GO:0010927,cellular component assembly involved in morphogenesis|GO:0051146,striated muscle cell differentiation|GO:0061061,muscle structure development|GO:0009653,anatomical structure morphogenesis|GO:0044699,si…	GO:0030016,myofibril|GO:0030017,sarcomere|GO:0043229,intracellular organelle|GO:0043228,non-membrane-bounded organelle|GO:0043226,organelle|GO:0030018,Z disc|GO:0005856,cytoskeleton|GO:0031674,I band|GO:0048471,perinuclear region of cytoplasm|GO:0005737,cytoplasm|GO:0031143,pseudopodium|GO:0044424,intracellular part|GO:0042995,cell projection|GO:0043232,intracellular non-membrane-bounded organell…	GO:0043169,cation binding|GO:0051393,alpha-actinin binding|GO:0046914,transition metal ion binding|GO:0008092,cytoskeletal protein binding|GO:0005080,protein kinase C binding|GO:0051371,muscle alpha-actinin binding|GO:0019899,enzyme binding|GO:0043167,ion binding|GO:0019901,protein kinase binding|GO:0019900,kinase binding|GO:0008270,zinc ion binding|GO:0005515,protein binding|GO:0042805,actinin b…
IGKV2-24	0.678795	-0.558951	Downregulated	A0A0C4DH68
CRIP2	0.67252	-0.572351	Downregulated	P52943	GO:0042127,regulation of cell proliferation|GO:0007275,multicellular organismal development|GO:0044699,single-organism process|GO:0050789,regulation of biological process|GO:0048513,organ development|GO:0065007,biological regulation|GO:0048518,positive regulation of biological process|GO:0048534,hematopoietic or lymphoid organ development|GO:0008284,positive regulation of cell proliferation|GO:00…	GO:0005737,cytoplasm|GO:0044464,cell part|GO:0005623,cell|GO:0005622,intracellular|GO:0044444,cytoplasmic part|GO:0071944,cell periphery|GO:0005938,cell cortex|GO:0044424,intracellular part|GO:0031012,extracellular matrix	GO:0043169,cation binding|GO:0046914,transition metal ion binding|GO:0043167,ion binding|GO:0005488,binding|GO:0046872,metal ion binding|GO:0008270,zinc ion binding
RRAGA	0.672326	-0.572768	Downregulated	Q7L523	GO:0008104,protein localization|GO:0019222,regulation of metabolic process|GO:0048584,positive regulation of response to stimulus|GO:0048583,regulation of response to stimulus|GO:0007165,signal transduction|GO:0034198,cellular response to amino acid starvation|GO:0038202,TORC1 signaling|GO:0043200,response to amino acid|GO:0051716,cellular response to stimulus|GO:0070727,cellular macromolecule lo…	GO:0000323,lytic vacuole|GO:0034448,EGO complex|GO:0043229,intracellular organelle|GO:0043227,membrane-bounded organelle|GO:0043226,organelle|GO:0005737,cytoplasm|GO:0005764,lysosome|GO:0031090,organelle membrane|GO:0005765,lysosomal membrane|GO:0005773,vacuole|GO:0098805,whole membrane|GO:0016020,membrane|GO:0005774,vacuolar membrane|GO:0044437,vacuolar part|GO:0035859,Seh1-associated complex|GO…	GO:0044389,ubiquitin-like protein ligase binding|GO:0035639,purine ribonucleoside triphosphate binding|GO:0019899,enzyme binding|GO:0005488,binding|GO:0042803,protein homodimerization activity|GO:0043167,ion binding|GO:1901363,heterocyclic compound binding|GO:1901265,nucleoside phosphate binding|GO:0001882,nucleoside binding|GO:0043168,anion binding|GO:0016462,pyrophosphatase activity|GO:0000166,…	hsa04150,mTOR signaling pathway
SYNE3	0.671581	-0.574367	Downregulated	G3V533	GO:0008104,protein localization|GO:0051651,maintenance of location in cell|GO:0071840,cellular component organization or biogenesis|GO:0090286,cytoskeletal anchoring at nuclear membrane|GO:0070727,cellular macromolecule localization|GO:0016043,cellular component organization|GO:0065007,biological regulation|GO:0044699,single-organism process|GO:0033036,macromolecule localization|GO:0034613,cellul…	GO:0005635,nuclear envelope|GO:0031975,envelope|GO:0043229,intracellular organelle|GO:0043227,membrane-bounded organelle|GO:0043226,organelle|GO:0031224,intrinsic component of membrane|GO:0016021,integral component of membrane|GO:0016020,membrane|GO:0031967,organelle envelope|GO:0034993,LINC complex|GO:0034992,microtubule organizing center attachment site|GO:0043234,protein complex|GO:0032991,mac…
IGLV1-51	0.670074	-0.577607	Downregulated	A0A075B6I5
AHNAK	0.669346	-0.579175	Downregulated	Q09666	GO:0051252,regulation of RNA metabolic process|GO:0080090,regulation of primary metabolic process|GO:0019222,regulation of metabolic process|GO:0070271,protein complex biogenesis|GO:0043933,macromolecular complex subunit organization|GO:0051049,regulation of transport|GO:0070588,calcium ion transmembrane transport|GO:0031323,regulation of cellular metabolic process|GO:1903169,regulation of calciu…	GO:0000323,lytic vacuole|GO:0015629,actin cytoskeleton|GO:0044421,extracellular region part|GO:0030016,myofibril|GO:0043229,intracellular organelle|GO:0043228,non-membrane-bounded organelle|GO:0005924,cell-substrate adherens junction|GO:0031988,membrane-bounded vesicle|GO:0043227,membrane-bounded organelle|GO:0043226,organelle|GO:0030054,cell junction|GO:0030055,cell-substrate junction|GO:0005856…	GO:0005515,protein binding|GO:0044548,S100 protein binding|GO:0097159,organic cyclic compound binding|GO:0044822,poly(A) RNA binding|GO:0005198,structural molecule activity|GO:0003723,RNA binding|GO:0003676,nucleic acid binding|GO:1901363,heterocyclic compound binding|GO:0097493,structural molecule activity conferring elasticity|GO:0005488,binding
PAK4	0.666219	-0.585931	Downregulated	O96013	GO:0019220,regulation of phosphate metabolic process|GO:0080090,regulation of primary metabolic process|GO:0019222,regulation of metabolic process|GO:0048583,regulation of response to stimulus|GO:0032147,activation of protein kinase activity|GO:0007165,signal transduction|GO:0023014,signal transduction by protein phosphorylation|GO:0051716,cellular response to stimulus|GO:0010604,positive regulat…	GO:0005737,cytoplasm|GO:0005794,Golgi apparatus|GO:0012505,endomembrane system|GO:0043231,intracellular membrane-bounded organelle|GO:0070161,anchoring junction|GO:0044464,cell part|GO:0044444,cytoplasmic part|GO:0005623,cell|GO:0005622,intracellular|GO:0043229,intracellular organelle|GO:0005912,adherens junction|GO:0044424,intracellular part|GO:0005924,cell-substrate adherens junction|GO:0005925…	GO:0035639,purine ribonucleoside triphosphate binding|GO:0017048,Rho GTPase binding|GO:0031267,small GTPase binding|GO:0051020,GTPase binding|GO:0004672,protein kinase activity|GO:0043167,ion binding|GO:1901363,heterocyclic compound binding|GO:0001883,purine nucleoside binding|GO:0001882,nucleoside binding|GO:0043168,anion binding|GO:0000166,nucleotide binding|GO:0004674,protein serine/threonine …	hsa05211,Renal cell carcinoma|hsa05206,MicroRNAs in cancer|hsa04660,T cell receptor signaling pathway|hsa04014,Ras signaling pathway|hsa04012,ErbB signaling pathway|hsa04510,Focal adhesion|hsa04360,Axon guidance|hsa04810,Regulation of actin cytoskeleton
HLA-DQB1	0.665167	-0.588211	Downregulated	Q5Y7D6	GO:0002504,antigen processing and presentation of peptide or polysaccharide antigen via MHC class II|GO:0019882,antigen processing and presentation|GO:0050896,response to stimulus|GO:0002376,immune system process|GO:0006955,immune response	GO:0042611,MHC protein complex|GO:0043234,protein complex|GO:0042613,MHC class II protein complex|GO:0032991,macromolecular complex|GO:0016021,integral component of membrane|GO:0016020,membrane|GO:0044464,cell part|GO:0005623,cell|GO:0098797,plasma membrane protein complex|GO:0098796,membrane protein complex|GO:0071944,cell periphery|GO:0005886,plasma membrane|GO:0044425,membrane part|GO:0044459,…		hsa05321,Inflammatory bowel disease (IBD)|hsa04612,Antigen processing and presentation|hsa05322,Systemic lupus erythematosus|hsa05323,Rheumatoid arthritis|hsa05320,Autoimmune thyroid disease|hsa05152,Tuberculosis|hsa05310,Asthma|hsa05140,Leishmaniasis|hsa05330,Allograft rejection|hsa04672,Intestinal immune network for IgA production|hsa04514,Cell adhesion molecules (CAMs)|hsa04145,Phagosome|hsa05…
UBQLN2	0.657527	-0.604879	Downregulated	Q9UHD9	GO:0032436,positive regulation of proteasomal ubiquitin-dependent protein catabolic process|GO:0080090,regulation of primary metabolic process|GO:0032434,regulation of proteasomal ubiquitin-dependent protein catabolic process|GO:0051049,regulation of transport|GO:1903069,regulation of ER-associated ubiquitin-dependent protein catabolic process|GO:0048584,positive regulation of response to stimulu…	GO:0005737,cytoplasm|GO:0031982,vesicle|GO:0005773,vacuole|GO:0031410,cytoplasmic vesicle|GO:0005634,nucleus|GO:0016020,membrane|GO:0044444,cytoplasmic part|GO:0005776,autophagosome|GO:0005623,cell|GO:0005622,intracellular|GO:0043229,intracellular organelle|GO:0071944,cell periphery|GO:0005886,plasma membrane|GO:0044424,intracellular part|GO:0044464,cell part|GO:0043227,membrane-bounded organelle…	GO:0005488,binding|GO:0005515,protein binding	hsa04141,Protein processing in endoplasmic reticulum
UBL4A	0.651176	-0.618881	Downregulated	Q5HY81		GO:0005737,cytoplasm|GO:0044464,cell part|GO:0005623,cell|GO:0005622,intracellular|GO:0044424,intracellular part
DOCK6	0.642998	-0.637114	Downregulated	Q96HP0	GO:0007599,hemostasis|GO:0009893,positive regulation of metabolic process|GO:0019222,regulation of metabolic process|GO:0007596,blood coagulation|GO:0023052,signaling|GO:0007165,signal transduction|GO:0035556,intracellular signal transduction|GO:0043087,regulation of GTPase activity|GO:0050789,regulation of biological process|GO:0043085,positive regulation of catalytic activity|GO:0051716,cellula…	GO:0005737,cytoplasm|GO:0005829,cytosol|GO:0044464,cell part|GO:0005623,cell|GO:0005622,intracellular|GO:0044444,cytoplasmic part|GO:0044424,intracellular part|GO:0048471,perinuclear region of cytoplasm	GO:0098772,molecular function regulator|GO:0005085,guanyl-nucleotide exchange factor activity
A0A0G2JN06	0.642668	-0.637855	Downregulated	A0A0G2JN06
ARHGEF17	0.641197	-0.641161	Downregulated	Q96PE2	GO:0071363,cellular response to growth factor stimulus|GO:0009893,positive regulation of metabolic process|GO:0019222,regulation of metabolic process|GO:0023051,regulation of signaling|GO:0046578,regulation of Ras protein signal transduction|GO:0030036,actin cytoskeleton organization|GO:0070848,response to growth factor|GO:0023052,signaling|GO:0007165,signal transduction|GO:0007166,cell surface r…	GO:0005737,cytoplasm|GO:0005829,cytosol|GO:0044464,cell part|GO:0005623,cell|GO:0005622,intracellular|GO:0044444,cytoplasmic part|GO:0044424,intracellular part	GO:0005089,Rho guanyl-nucleotide exchange factor activity|GO:0005088,Ras guanyl-nucleotide exchange factor activity|GO:0098772,molecular function regulator|GO:0005085,guanyl-nucleotide exchange factor activity
SERPINA3	0.640262	-0.643265	Downregulated	P01011	GO:0006954,inflammatory response|GO:0007586,digestion|GO:0009892,negative regulation of metabolic process|GO:0080090,regulation of primary metabolic process|GO:0019222,regulation of metabolic process|GO:0060249,anatomical structure homeostasis|GO:0031324,negative regulation of cellular metabolic process|GO:0031323,regulation of cellular metabolic process|GO:0042592,homeostatic process|GO:0022600,…	GO:0043231,intracellular membrane-bounded organelle|GO:0005622,intracellular|GO:0043230,extracellular organelle|GO:0031982,vesicle|GO:0044421,extracellular region part|GO:0043227,membrane-bounded organelle|GO:0005634,nucleus|GO:0044464,cell part|GO:0005623,cell|GO:0031988,membrane-bounded vesicle|GO:0043229,intracellular organelle|GO:0005576,extracellular region|GO:0005615,extracellular space|GO:…	GO:0004866,endopeptidase inhibitor activity|GO:0097159,organic cyclic compound binding|GO:0061135,endopeptidase regulator activity|GO:0061134,peptidase regulator activity|GO:1901363,heterocyclic compound binding|GO:0005515,protein binding|GO:0030414,peptidase inhibitor activity|GO:0004867,serine-type endopeptidase inhibitor activity|GO:0004857,enzyme inhibitor activity|GO:0098772,molecular functi…
ADIRF	0.638649	-0.646904	Downregulated	Q15847	GO:0080090,regulation of primary metabolic process|GO:0019222,regulation of metabolic process|GO:0048583,regulation of response to stimulus|GO:1901362,organic cyclic compound biosynthetic process|GO:1901360,organic cyclic compound metabolic process|GO:0051716,cellular response to stimulus|GO:0010604,positive regulation of macromolecule metabolic process|GO:0048869,cellular developmental process|G…	GO:0031974,membrane-enclosed lumen|GO:0043229,intracellular organelle|GO:0043227,membrane-bounded organelle|GO:0043226,organelle|GO:0005737,cytoplasm|GO:0070062,extracellular exosome|GO:0031981,nuclear lumen|GO:0005634,nucleus|GO:0031988,membrane-bounded vesicle|GO:0005654,nucleoplasm|GO:1903561,extracellular vesicle|GO:0031982,vesicle|GO:0043230,extracellular organelle|GO:0043231,intracellular m…
APCS	0.633161	-0.659356	Downregulated	P02743	GO:0080090,regulation of primary metabolic process|GO:0019222,regulation of metabolic process|GO:0030224,monocyte differentiation|GO:0048585,negative regulation of response to stimulus|GO:0048583,regulation of response to stimulus|GO:0031348,negative regulation of defense response|GO:0052203,modulation of catalytic activity in other organism involved in symbiotic interaction|GO:0051701,interactio…	GO:0031012,extracellular matrix|GO:0043229,intracellular organelle|GO:0043227,membrane-bounded organelle|GO:0043226,organelle|GO:0070062,extracellular exosome|GO:0005634,nucleus|GO:0072562,blood microparticle|GO:0031988,membrane-bounded vesicle|GO:0031982,vesicle|GO:0032991,macromolecular complex|GO:1903561,extracellular vesicle|GO:0005615,extracellular space|GO:0043234,protein complex|GO:0043230…	GO:0005488,binding|GO:0043169,cation binding|GO:0030246,carbohydrate binding|GO:0051082,unfolded protein binding|GO:0043167,ion binding|GO:0046790,virion binding|GO:0001848,complement binding|GO:0005509,calcium ion binding|GO:0005515,protein binding|GO:0001849,complement component C1q binding|GO:0046872,metal ion binding|GO:0001846,opsonin binding
PTMS	0.625768	-0.6763	Downregulated	F5H7R9
HLA-B	0.621814	-0.685446	Downregulated	Q04826	GO:0019221,cytokine-mediated signaling pathway|GO:0048583,regulation of response to stimulus|GO:0042590,antigen processing and presentation of exogenous peptide antigen via MHC class I|GO:0023052,signaling|GO:0007165,signal transduction|GO:0007166,cell surface receptor signaling pathway|GO:0042221,response to chemical|GO:0048002,antigen processing and presentation of peptide antigen|GO:0070887,ce…	GO:0005783,endoplasmic reticulum|GO:0098576,lumenal side of membrane|GO:0005886,plasma membrane|GO:0005789,endoplasmic reticulum membrane|GO:0030139,endocytic vesicle|GO:0042175,nuclear outer membrane-endoplasmic reticulum membrane network|GO:0043229,intracellular organelle|GO:0030176,integral component of endoplasmic reticulum membrane|GO:0031301,integral component of organelle membrane|GO:00313…	GO:0042277,peptide binding|GO:0042605,peptide antigen binding|GO:0033218,amide binding|GO:0005488,binding|GO:0003823,antigen binding
CTSD	0.620997	-0.687342	Downregulated	P07339	GO:0008152,metabolic process|GO:0002495,antigen processing and presentation of peptide antigen via MHC class II|GO:0044248,cellular catabolic process|GO:0043170,macromolecule metabolic process|GO:0032963,collagen metabolic process|GO:0048002,antigen processing and presentation of peptide antigen|GO:0044243,multicellular organismal catabolic process|GO:0071840,cellular component organization or bi…	GO:0000323,lytic vacuole|GO:0048770,pigment granule|GO:0031974,membrane-enclosed lumen|GO:0031012,extracellular matrix|GO:0043229,intracellular organelle|GO:0005773,vacuole|GO:0043227,membrane-bounded organelle|GO:0043226,organelle|GO:0005737,cytoplasm|GO:0005764,lysosome|GO:0043202,lysosomal lumen|GO:0070062,extracellular exosome|GO:0016023,cytoplasmic membrane-bounded vesicle|GO:0031410,cytopla…	GO:0016787,hydrolase activity|GO:0004175,endopeptidase activity|GO:0070001,aspartic-type peptidase activity|GO:0003824,catalytic activity|GO:0070011,peptidase activity, acting on L-amino acid peptides|GO:0004190,aspartic-type endopeptidase activity|GO:0005488,binding|GO:0005515,protein binding|GO:0008233,peptidase activity	hsa04071,Sphingolipid signaling pathway|hsa04210,Apoptosis|hsa04142,Lysosome|hsa05152,Tuberculosis
SNCG	0.609867	-0.713434	Downregulated	O76070	GO:0050808,synapse organization|GO:0051234,establishment of localization|GO:0051046,regulation of secretion|GO:0015850,organic hydroxy compound transport|GO:0051049,regulation of transport|GO:0023051,regulation of signaling|GO:0007610,behavior|GO:0050804,modulation of synaptic transmission|GO:0032940,secretion by cell|GO:0008104,protein localization|GO:0023052,signaling|GO:1903530,regulation of s…	GO:0042995,cell projection|GO:0030424,axon|GO:0043229,intracellular organelle|GO:0043228,non-membrane-bounded organelle|GO:0005815,microtubule organizing center|GO:0043227,membrane-bounded organelle|GO:0043226,organelle|GO:0005856,cytoskeleton|GO:0005819,spindle|GO:0031982,vesicle|GO:0031988,membrane-bounded vesicle|GO:0097458,neuron part|GO:0044430,cytoskeletal part|GO:0043005,neuron projection|…
TWF1	0.60459	-0.725971	Downregulated	F8VS81	GO:0022607,cellular component assembly|GO:0006461,protein complex assembly|GO:0033043,regulation of organelle organization|GO:0043933,macromolecular complex subunit organization|GO:0051129,negative regulation of cellular component organization|GO:0051128,regulation of cellular component organization|GO:0008064,regulation of actin polymerization or depolymerization|GO:0034622,cellular macromolecul…	GO:0005737,cytoplasm|GO:0044464,cell part|GO:0005623,cell|GO:0005622,intracellular|GO:0044424,intracellular part	GO:0003779,actin binding|GO:0005488,binding|GO:0005515,protein binding|GO:0008092,cytoskeletal protein binding
SCRN3	0.602767	-0.730328	Downregulated	F8W0M9	GO:0044238,primary metabolic process|GO:0046903,secretion|GO:0009987,cellular process|GO:0016192,vesicle-mediated transport|GO:0019538,protein metabolic process|GO:0006810,transport|GO:0006887,exocytosis|GO:0032940,secretion by cell|GO:0043170,macromolecule metabolic process|GO:0071704,organic substance metabolic process|GO:0044765,single-organism transport|GO:0044763,single-organism cellular pro…	GO:0005623,cell	GO:0016787,hydrolase activity|GO:0003824,catalytic activity|GO:0016805,dipeptidase activity|GO:0008238,exopeptidase activity|GO:0070011,peptidase activity, acting on L-amino acid peptides|GO:0008233,peptidase activity
GOLM1	0.599462	-0.73826	Downregulated	Q8NBJ4	GO:0006996,organelle organization|GO:0006997,nucleus organization|GO:0044710,single-organism metabolic process|GO:0044238,primary metabolic process|GO:0006629,lipid metabolic process|GO:0019222,regulation of metabolic process|GO:0019216,regulation of lipid metabolic process|GO:0009987,cellular process|GO:0016043,cellular component organization|GO:0071704,organic substance metabolic process|GO:006…	GO:0043229,intracellular organelle|GO:0071944,cell periphery|GO:0031226,intrinsic component of plasma membrane|GO:0043226,organelle|GO:0031224,intrinsic component of membrane|GO:0005737,cytoplasm|GO:0031982,vesicle|GO:0043227,membrane-bounded organelle|GO:0016021,integral component of membrane|GO:0016020,membrane|GO:0031988,membrane-bounded vesicle|GO:0005615,extracellular space|GO:0044459,plasma…	GO:0005488,binding|GO:0005515,protein binding
HP	0.561809	-0.831849	Downregulated	P00738	GO:0044710,single-organism metabolic process|GO:0009607,response to biotic stimulus|GO:0009894,regulation of catabolic process|GO:0009895,negative regulation of catabolic process|GO:0009892,negative regulation of metabolic process|GO:0006954,inflammatory response|GO:0019222,regulation of metabolic process|GO:0048585,negative regulation of response to stimulus|GO:0031324,negative regulation of cel…	GO:0031974,membrane-enclosed lumen|GO:0030139,endocytic vesicle|GO:0043229,intracellular organelle|GO:0060205,cytoplasmic membrane-bounded vesicle lumen|GO:0043227,membrane-bounded organelle|GO:0043226,organelle|GO:0005737,cytoplasm|GO:0031983,vesicle lumen|GO:0070062,extracellular exosome|GO:0071682,endocytic vesicle lumen|GO:0016023,cytoplasmic membrane-bounded vesicle|GO:0031410,cytoplasmic ve…	GO:0030492,hemoglobin binding|GO:0016209,antioxidant activity|GO:0005488,binding|GO:0005515,protein binding
LRRC8A	0.524534	-0.930891	Downregulated	Q8IWT6	GO:0032502,developmental process|GO:0006950,response to stress|GO:0030154,cell differentiation|GO:0042113,B cell activation|GO:0042592,homeostatic process|GO:0045321,leukocyte activation|GO:0006820,anion transport|GO:0051179,localization|GO:0007275,multicellular organismal development|GO:0044699,single-organism process|GO:0006884,cell volume homeostasis|GO:0048869,cellular developmental process|G…	GO:0043234,protein complex|GO:1902495,transmembrane transporter complex|GO:0044464,cell part|GO:0016021,integral component of membrane|GO:0016020,membrane|GO:1990351,transporter complex|GO:0005623,cell|GO:0098796,membrane protein complex|GO:0071944,cell periphery|GO:0034702,ion channel complex|GO:0005886,plasma membrane|GO:0044425,membrane part|GO:0009986,cell surface|GO:0032991,macromolecular co…	GO:0022891,substrate-specific transmembrane transporter activity|GO:0022838,substrate-specific channel activity|GO:0005215,transporter activity|GO:0005216,ion channel activity|GO:0015075,ion transmembrane transporter activity|GO:0022857,transmembrane transporter activity|GO:0022892,substrate-specific transporter activity|GO:0005488,binding|GO:0005515,protein binding|GO:0015267,channel activity|GO…
SNCA	0.522505	-0.936483	Downregulated	H6UYS7	GO:0060341,regulation of cellular localization|GO:0015850,organic hydroxy compound transport|GO:0051049,regulation of transport|GO:0015872,dopamine transport|GO:0032940,secretion by cell|GO:1903530,regulation of secretion by cell|GO:0015837,amine transport|GO:0014059,regulation of dopamine secretion|GO:0044070,regulation of anion transport|GO:0050432,catecholamine secretion|GO:0050789,regulation …	GO:0005737,cytoplasm|GO:0044464,cell part|GO:0005623,cell|GO:0005622,intracellular|GO:0044424,intracellular part
HLA-DRB1	0.50538	-0.984559	Downregulated	P20039	GO:0002495,antigen processing and presentation of peptide antigen via MHC class II|GO:0071593,lymphocyte aggregation|GO:0016337,single organismal cell-cell adhesion|GO:0019221,cytokine-mediated signaling pathway|GO:0034110,regulation of homotypic cell-cell adhesion|GO:0050865,regulation of cell activation|GO:0050867,positive regulation of cell activation|GO:0048584,positive regulation of response…	GO:0005783,endoplasmic reticulum|GO:0098576,lumenal side of membrane|GO:0005789,endoplasmic reticulum membrane|GO:0031984,organelle subcompartment|GO:0031982,vesicle|GO:0005773,vacuole|GO:0016021,integral component of membrane|GO:0005770,late endosome|GO:0005774,vacuolar membrane|GO:0031902,late endosome membrane|GO:0005794,Golgi apparatus|GO:0098588,bounding membrane of organelle|GO:0043234,prot…	GO:0038023,signaling receptor activity|GO:0032395,MHC class II receptor activity|GO:0060089,molecular transducer activity|GO:0004888,transmembrane signaling receptor activity|GO:0004872,receptor activity|GO:0004871,signal transducer activity
HLA-DRB1	0.50538	-0.984559	Downregulated	Q30134	GO:0002495,antigen processing and presentation of peptide antigen via MHC class II|GO:0071593,lymphocyte aggregation|GO:0016337,single organismal cell-cell adhesion|GO:0019221,cytokine-mediated signaling pathway|GO:0034110,regulation of homotypic cell-cell adhesion|GO:0050865,regulation of cell activation|GO:0050867,positive regulation of cell activation|GO:0048584,positive regulation of response…	GO:0098796,membrane protein complex|GO:0000323,lytic vacuole|GO:0005783,endoplasmic reticulum|GO:0098576,lumenal side of membrane|GO:0098552,side of membrane|GO:0005789,endoplasmic reticulum membrane|GO:0030139,endocytic vesicle|GO:0031984,organelle subcompartment|GO:0043229,intracellular organelle|GO:0030176,integral component of endoplasmic reticulum membrane|GO:0031301,integral component of or…
MT-CO1	0.481898	-1.0532	Downregulated	P00395	GO:0009167,purine ribonucleoside monophosphate metabolic process|GO:0060322,head development|GO:0044281,small molecule metabolic process|GO:0009161,ribonucleoside monophosphate metabolic process|GO:1901362,organic cyclic compound biosynthetic process|GO:1901360,organic cyclic compound metabolic process|GO:0044710,single-organism metabolic process|GO:0010035,response to inorganic substance|GO:0006…	GO:0044464,cell part|GO:0031975,envelope|GO:0043229,intracellular organelle|GO:0070069,cytochrome complex|GO:0043227,membrane-bounded organelle|GO:0043226,organelle|GO:0031224,intrinsic component of membrane|GO:0005737,cytoplasm|GO:0005751,mitochondrial respiratory chain complex IV|GO:0031090,organelle membrane|GO:0005743,mitochondrial inner membrane|GO:0016021,integral component of membrane|GO:0…	GO:0005488,binding|GO:1901363,heterocyclic compound binding|GO:0016491,oxidoreductase activity|GO:0043169,cation binding|GO:0046914,transition metal ion binding|GO:0015077,monovalent inorganic cation transmembrane transporter activity|GO:0043167,ion binding|GO:0005506,iron ion binding|GO:0046872,metal ion binding|GO:0015002,heme-copper terminal oxidase activity|GO:0004129,cytochrome-c oxidase act…	hsa00190,Oxidative phosphorylation|hsa04260,Cardiac muscle contraction|hsa01100,Metabolic pathways|hsa04932,Non-alcoholic fatty liver disease (NAFLD)|hsa05016,Huntington's disease|hsa05010,Alzheimer's disease|hsa05012,Parkinson's disease
HLA-C	0.463362	-1.10979	Downregulated	P30499	GO:0019221,cytokine-mediated signaling pathway|GO:0002479,antigen processing and presentation of exogenous peptide antigen via MHC class I, TAP-dependent|GO:0002483,antigen processing and presentation of endogenous peptide antigen|GO:0048583,regulation of response to stimulus|GO:0042590,antigen processing and presentation of exogenous peptide antigen via MHC class I|GO:0023052,signaling|GO:000716…	GO:0005783,endoplasmic reticulum|GO:0098576,lumenal side of membrane|GO:0005886,plasma membrane|GO:0005789,endoplasmic reticulum membrane|GO:0030139,endocytic vesicle|GO:0042175,nuclear outer membrane-endoplasmic reticulum membrane network|GO:0043229,intracellular organelle|GO:0030176,integral component of endoplasmic reticulum membrane|GO:0031301,integral component of organelle membrane|GO:00313…	GO:0042277,peptide binding|GO:0003823,antigen binding|GO:0042605,peptide antigen binding|GO:0033218,amide binding|GO:0005488,binding|GO:0005515,protein binding|GO:0046977,TAP binding
SAP18	0.442164	-1.17735	Downregulated	X6RAL5				hsa03015,mRNA surveillance pathway|hsa03013,RNA transport
BASP1	0.417468	-1.26026	Downregulated	P80723	GO:0080090,regulation of primary metabolic process|GO:0019222,regulation of metabolic process|GO:0048468,cell development|GO:0072359,circulatory system development|GO:0072358,cardiovascular system development|GO:0035265,organ growth|GO:0032989,cellular component morphogenesis|GO:1901362,organic cyclic compound biosynthetic process|GO:0071840,cellular component organization or biogenesis|GO:000751…	GO:0042995,cell projection|GO:0030427,site of polarized growth|GO:0030426,growth cone|GO:0031974,membrane-enclosed lumen|GO:0043229,intracellular organelle|GO:0043228,non-membrane-bounded organelle|GO:0005622,intracellular|GO:0043227,membrane-bounded organelle|GO:0043226,organelle|GO:0030054,cell junction|GO:0008180,COP9 signalosome|GO:0016607,nuclear speck|GO:0016604,nuclear body|GO:0070062,extr…	GO:0044212,transcription regulatory region DNA binding|GO:0003714,transcription corepressor activity|GO:0005515,protein binding|GO:0097159,organic cyclic compound binding|GO:0000975,regulatory region DNA binding|GO:0001067,regulatory region nucleic acid binding|GO:0003712,transcription cofactor activity|GO:0000989,transcription factor activity, transcription factor binding|GO:0019904,protein doma…
CLC	0.414468	-1.27067	Downregulated	Q05315	GO:0034110,regulation of homotypic cell-cell adhesion|GO:0070231,T cell apoptotic process|GO:0048583,regulation of response to stimulus|GO:0022407,regulation of cell-cell adhesion|GO:0002706,regulation of lymphocyte mediated immunity|GO:0002703,regulation of leukocyte mediated immunity|GO:0002700,regulation of production of molecular mediator of immune response|GO:0002456,T cell mediated immunity…	GO:0005737,cytoplasm|GO:0005829,cytosol|GO:0044464,cell part|GO:0005623,cell|GO:0005622,intracellular|GO:0044444,cytoplasmic part|GO:0044424,intracellular part	GO:0016787,hydrolase activity|GO:0097153,cysteine-type endopeptidase activity involved in apoptotic process|GO:0016298,lipase activity|GO:0030246,carbohydrate binding|GO:0052689,carboxylic ester hydrolase activity|GO:0070011,peptidase activity, acting on L-amino acid peptides|GO:0016788,hydrolase activity, acting on ester bonds|GO:0003824,catalytic activity|GO:0004197,cysteine-type endopeptidase …
PAPSS1	0.407298	-1.29584	Downregulated	O43252	GO:0001501,skeletal system development|GO:0009165,nucleotide biosynthetic process|GO:0009163,nucleoside biosynthetic process|GO:1901362,organic cyclic compound biosynthetic process|GO:0050427,3'-phosphoadenosine 5'-phosphosulfate metabolic process|GO:1901360,organic cyclic compound metabolic process|GO:0051716,cellular response to stimulus|GO:0044711,single-organism biosynthetic process|GO:005508…	GO:0005737,cytoplasm|GO:0005829,cytosol|GO:0044464,cell part|GO:0005623,cell|GO:0005622,intracellular|GO:0044444,cytoplasmic part|GO:0044424,intracellular part	GO:0035639,purine ribonucleoside triphosphate binding|GO:0005488,binding|GO:0043167,ion binding|GO:1901363,heterocyclic compound binding|GO:0001883,purine nucleoside binding|GO:0001882,nucleoside binding|GO:0043168,anion binding|GO:0000166,nucleotide binding|GO:0016740,transferase activity|GO:0004779,sulfate adenylyltransferase activity|GO:0032549,ribonucleoside binding|GO:0017076,purine nucleoti…	hsa00920,Sulfur metabolism|hsa00450,Selenocompound metabolism|hsa01100,Metabolic pathways|hsa00230,Purine metabolism
HLA-DQA1	0.336501	-1.57132	Downregulated	E9PMV2	GO:0002504,antigen processing and presentation of peptide or polysaccharide antigen via MHC class II|GO:0019882,antigen processing and presentation|GO:0050896,response to stimulus|GO:0002376,immune system process|GO:0006955,immune response	GO:0042611,MHC protein complex|GO:0043234,protein complex|GO:0042613,MHC class II protein complex|GO:0032991,macromolecular complex|GO:0016021,integral component of membrane|GO:0016020,membrane|GO:0044464,cell part|GO:0005623,cell|GO:0098797,plasma membrane protein complex|GO:0098796,membrane protein complex|GO:0071944,cell periphery|GO:0005886,plasma membrane|GO:0044425,membrane part|GO:0044459,…
